# Supplementary material
Source: publisher figshare collection journal article supplement (https://acs.figshare.com/ndownloader/files/4138210)

# Supporting Informations

## Study of the Total Synthesis of (-)-Exiguolide

*Cyril Cook, Frédéric Liron, Xavier Guinchard and Emmanuel Roulland\**

Institut de Chimie des Substances Naturelles / CNRS.  
Centre de Recherche de Gif.  
Avenue de la Terrasse, 91198 Gif-sur-Yvette, France.  
Fax: (+) 33 1 69 07 72 47.  
Web site: <http://www.icsn.cnrs-gif.fr>.  
[emmanuel.roulland@icsn.cnrs-gif.fr](mailto:emmanuel.roulland@icsn.cnrs-gif.fr)

$^1\text{H}$  and  $^{13}\text{C}$  NMR spectra for compound:

|                  |     |
|------------------|-----|
| <b>6</b>         | S4  |
| <b>11</b>        | S5  |
| <b>12</b>        | S7  |
| <b>13</b>        | S8  |
| <b>14</b>        | S9  |
| <b>15</b>        | S10 |
| <b>16</b>        | S12 |
| <b>17</b>        | S13 |
| <b>2</b>         | S14 |
| <b>23 and 24</b> | S15 |
| <b>(-)-28</b>    | S16 |
| <b>7</b>         | S17 |
| <b>32</b>        | S18 |
| <b>8</b>         | S19 |
| <b>33</b>        | S20 |
| <b>34a</b>       | S22 |
| <b>34b</b>       | S23 |
| <b>35</b>        | S24 |
| <b>36</b>        | S25 |
| <b>37</b>        | S26 |
| <b>39</b>        | S28 |
| <b>40</b>        | S29 |
| <b>41</b>        | S30 |
| <b>42</b>        | S31 |
| <b>43</b>        | S32 |
| <b>44</b>        | S33 |
| <b>45</b>        | S34 |
| <b>46</b>        | S35 |
| <b>38</b>        | S36 |
| <b>47</b>        | S37 |

## General Methods and Standard Procedures

Solvents: THF, Et<sub>2</sub>O and toluene were refluxed on sodium-benzophenone and then distilled under argon. CH<sub>2</sub>Cl<sub>2</sub> and NMP were dried by refluxing on CaH<sub>2</sub> and then distilled under argon. Acetone, CH<sub>3</sub>CN, DMF, DMSO and EtOH were stored over 4 Å MS and MeOH over 3 Å MS. When required, solvent degassing was achieved by repeated freeze-vacuum cycles. Solvents used for extractions and purifications were used as received, except heptane and pentane, which were distilled using a rotational evaporator prior to use in chromatography, to remove non-volatile impurities.

Reagents and reactants: Unless otherwise noted, all reagents were obtained from commercial suppliers and were used as received. However, some of them were specifically purified prior to use:

- Et<sub>3</sub>N was dried by refluxing on CaH<sub>2</sub> and distilled under argon.
- Acrolein was refluxed on CaSO<sub>4</sub> and distilled under argon prior to use.
- Commercial solution of organometallic reagents (*n*-BuLi, *t*-BuLi, MeMgBr, vinylmagnesium bromide, ethynylmagnesium bromide, KHMDS) were used as received, based on their theoretical concentrations. However, when needed, their actual concentration was assessed using the *s*-BuOH-1,10-phenanthroline titration method.<sup>1</sup>
- LDA and LiHMDS were prepared prior to use by slow addition of the amine into a solution of *n*-BuLi in heptanes at 0 °C and stirred for 30 min. The concentration of these solutions might then be adjusted by addition of distilled THF.

Reaction conditions: Unless otherwise noted, all reactions were performed using oven dried glassware under an atmosphere of dry argon.

Purification methods: Classic **flash chromatography** was performed using silica gel 60 (35-70 µm). **Preparative HPLC** purifications were carried out normal phase silica gel columns and a differential refractometer as the detector. Several products were purified by **short-path and bulb-to-bulb distillation** apparatus. In this case, the given temperature (*T*<sub>set</sub>) is not the actual temperature of distillation of the product but just an indicative setting temperature.

Analytical methods: **Thin-layer chromatography (TLC)** plates (F<sub>254</sub> aluminium sheets) were analyzed by ultraviolet (254 nm and/or 365 nm) and spraying with various stains, followed by heating:

- Vanillin: vanillin (1 g) and H<sub>2</sub>SO<sub>4</sub> (2 mL) in EtOH (100 mL).

---

<sup>1</sup> S. C. Watson, J. F. Eastham, *J. Organomet. Chem.* **1967**, 9, 165-168.

- Phosphomolybdic acid: Phosphomolybdic acid (10 g) in EtOH (100 mL).
- FeCl<sub>3</sub>: FeCl<sub>3</sub> (1 g) in EtOH (100 mL). Used for specific staining of phenols.
- Retention factors (**R<sub>f</sub>**) are defined as the distance traveled by the compound divided by the distance traveled by the solvent.

**Infrared spectra (IR)** were recorded neat. Wavenumbers ( $\nu$ ) are reported in reciprocal centimeters (cm<sup>-1</sup>).

For **<sup>1</sup>H NMR-spectra** (300 or 500 MHz) and **<sup>13</sup>C NMR-spectra** (75,5 or 125.8 MHz), chemical shifts ( $\delta$ ) are given in ppm and were referenced to the internal solvent signal<sup>2</sup> or to TMS as an internal standard. Multiplicities are declared as follow: s (singlet), d (doublet), t (triplet), q (quadruplet), dd (doublet of doublet), ddd (doublet of doublet of doublet), ddt (doublet of doublet of triplet), ddq (doublet of doublet of quadruplet), td (triplet of doublet), m (multiplet) and br s (broad signal). Coupling constant (*J*) are given in Hz. Assignments of proton resonances were confirmed, when possible, by correlated spectroscopy (COSY <sup>1</sup>H-<sup>1</sup>H, HMQC, HMBC).

Low- and high-resolution mass spectra methods (**LRMS** TOF and **HRMS** TOF) used are electrospray (ESI), electronic impact (EI) and chemical ionization (CI).

**Elemental analyses (Anal.)** results are given as the average values of at least two determinations.

**Melting points (MP)** were determined after crystallization or precipitation from the solvents indicated between brackets.

Special instructions for acid-sensitive compounds: Many compounds described in this work are acid-sensitive. In order to avoid their degradation, the following preventive measures were taken:

- washing with a saturated aqueous solution of NaHCO<sub>3</sub> at the end of the extraction;
- drying on a Na<sub>2</sub>SO<sub>4</sub>/K<sub>2</sub>CO<sub>3</sub> mixture before filtration and removal of the solvents;
- purification on neutralized silica gel, prepared by treatment with Et<sub>3</sub>N (25 mL per kg of silica gel) in EtOAc, followed by concentration and drying under vacuum;
- NMR experiments carried out in C<sub>6</sub>D<sub>6</sub> instead of CDCl<sub>3</sub>.

<sup>2</sup> H. E. Gottlieb, V. Kotlyar, A. Nudelman, *J. Org. Chem.* **1997**, 62, 7512-7515.

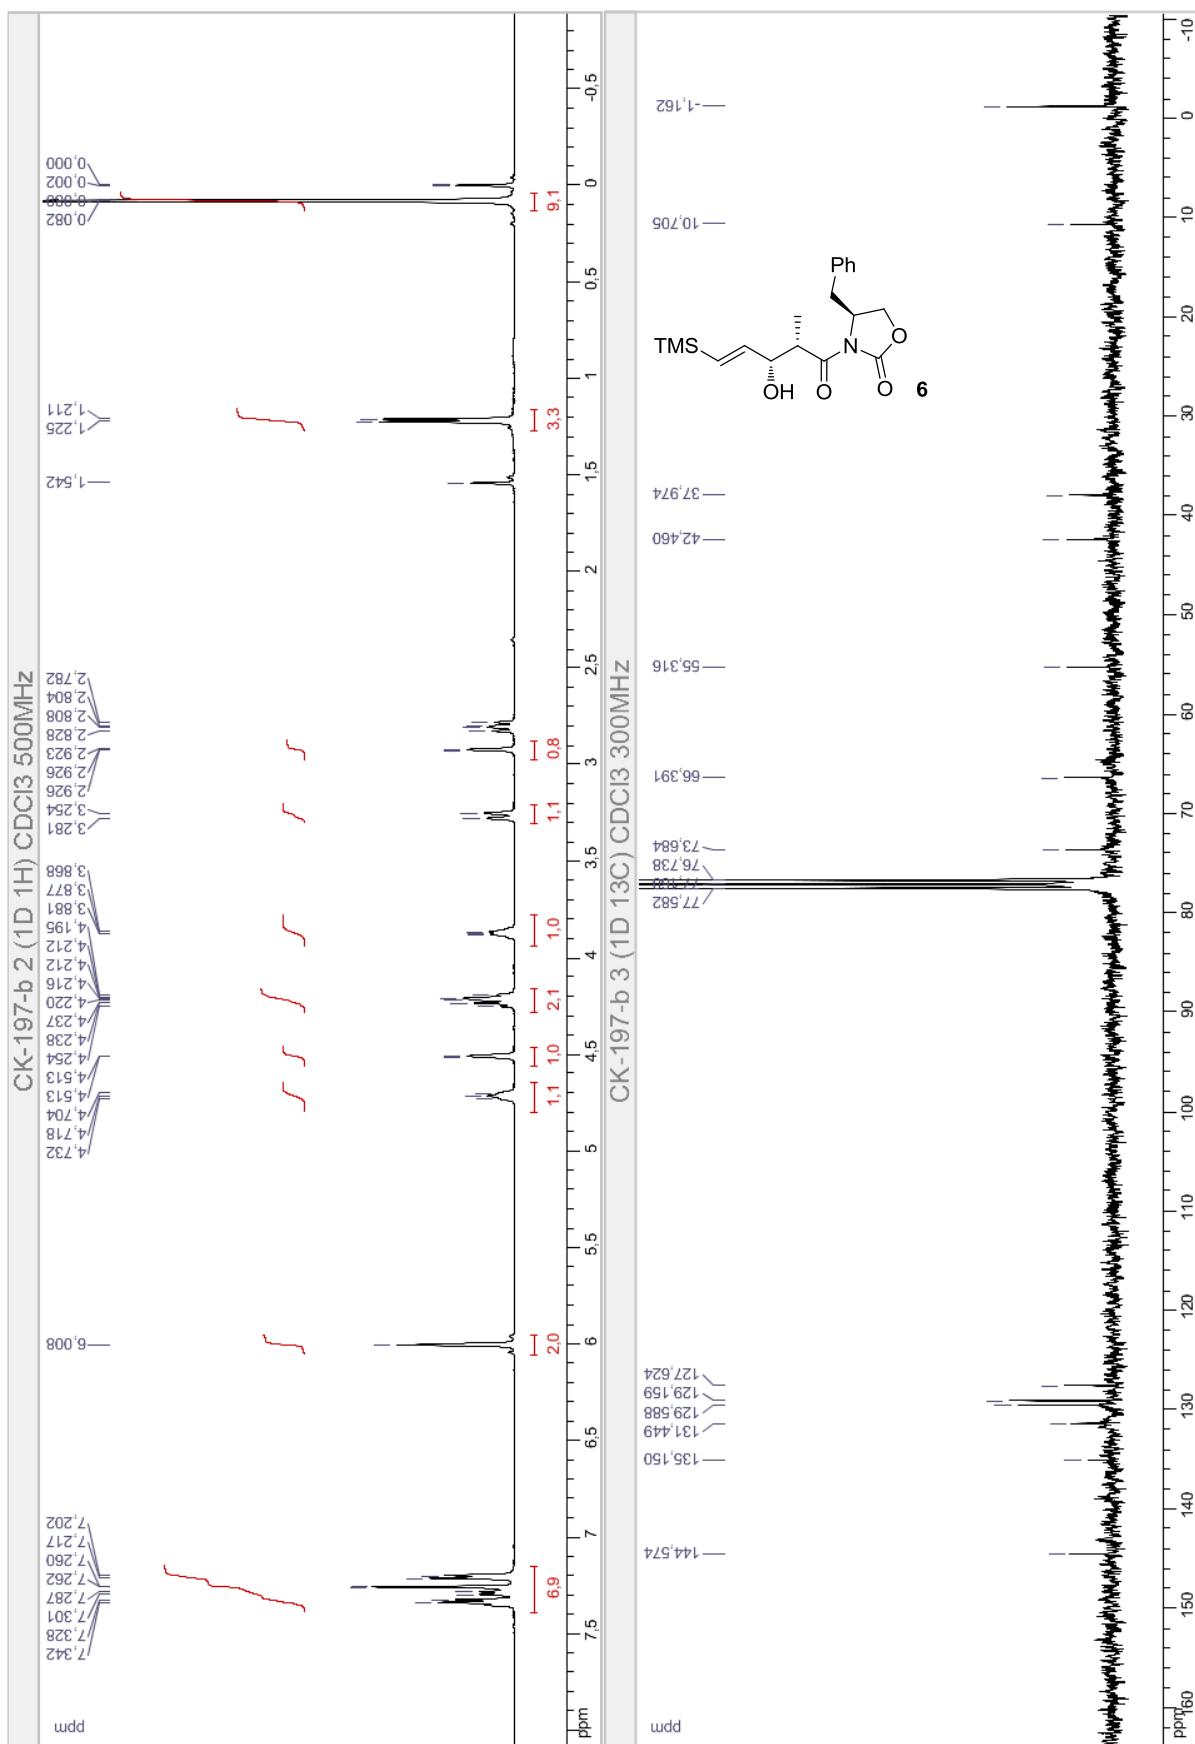

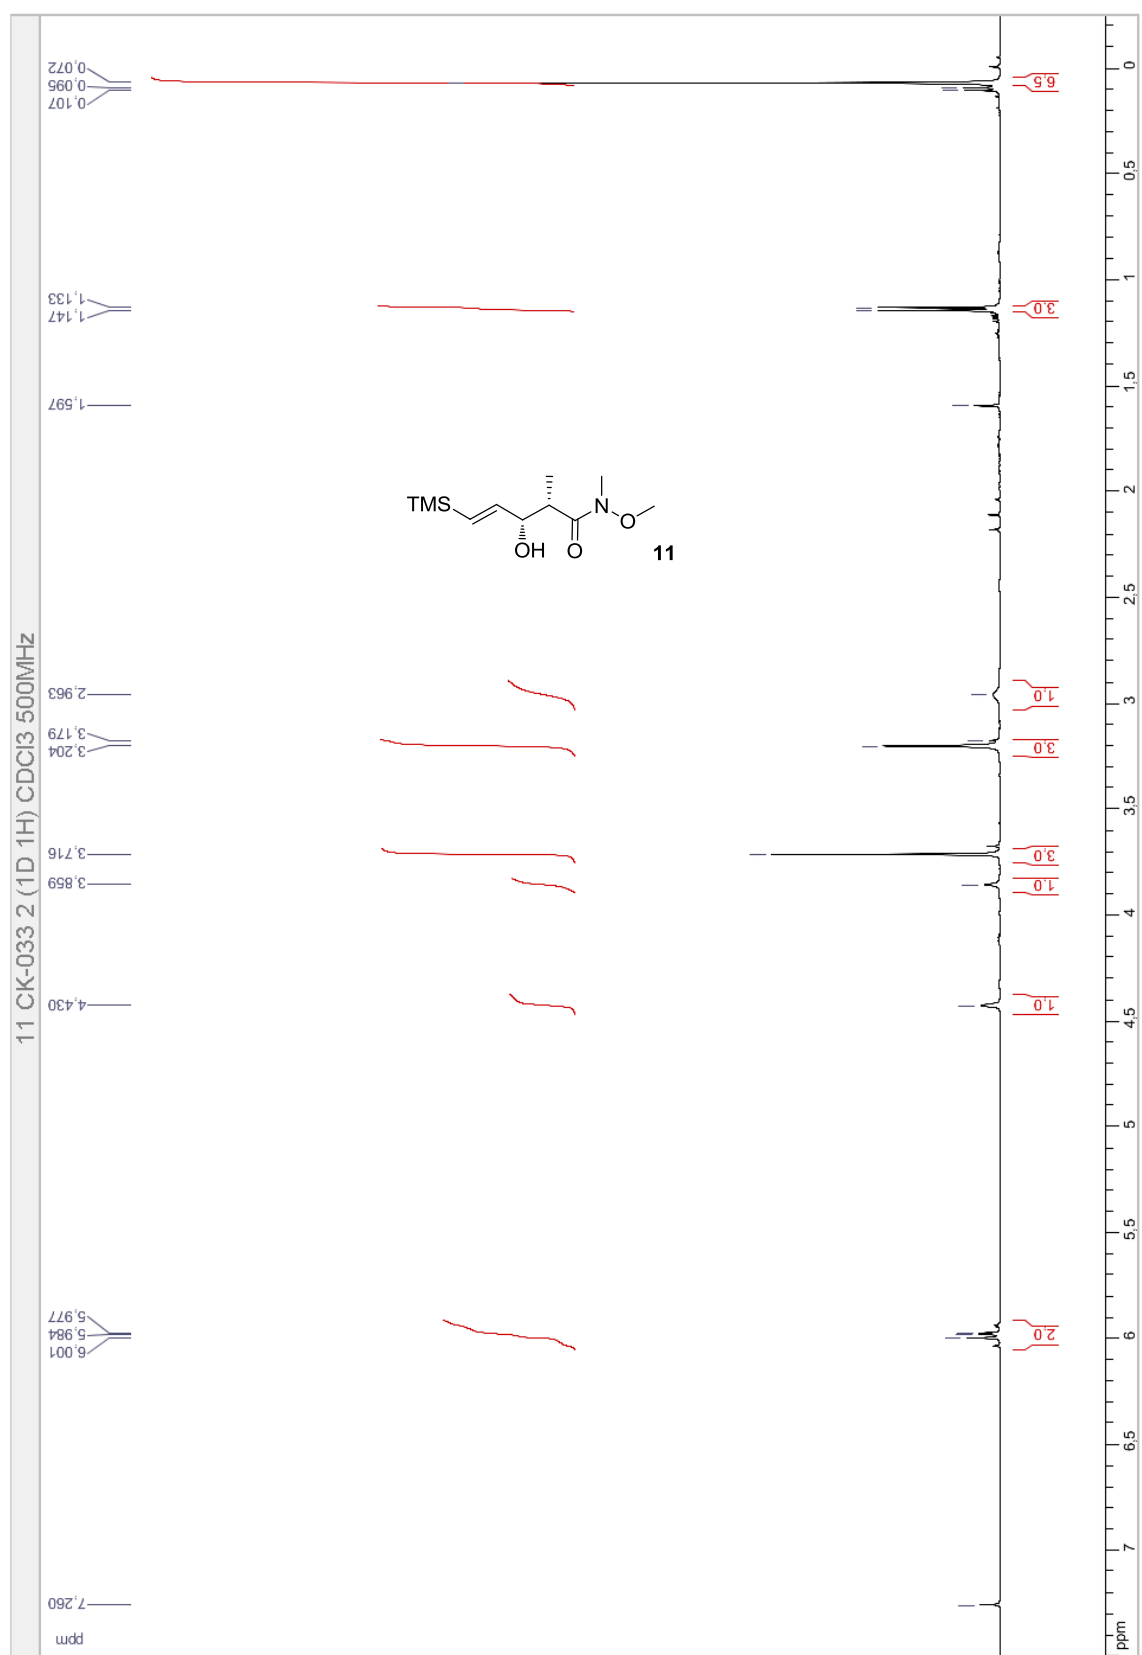

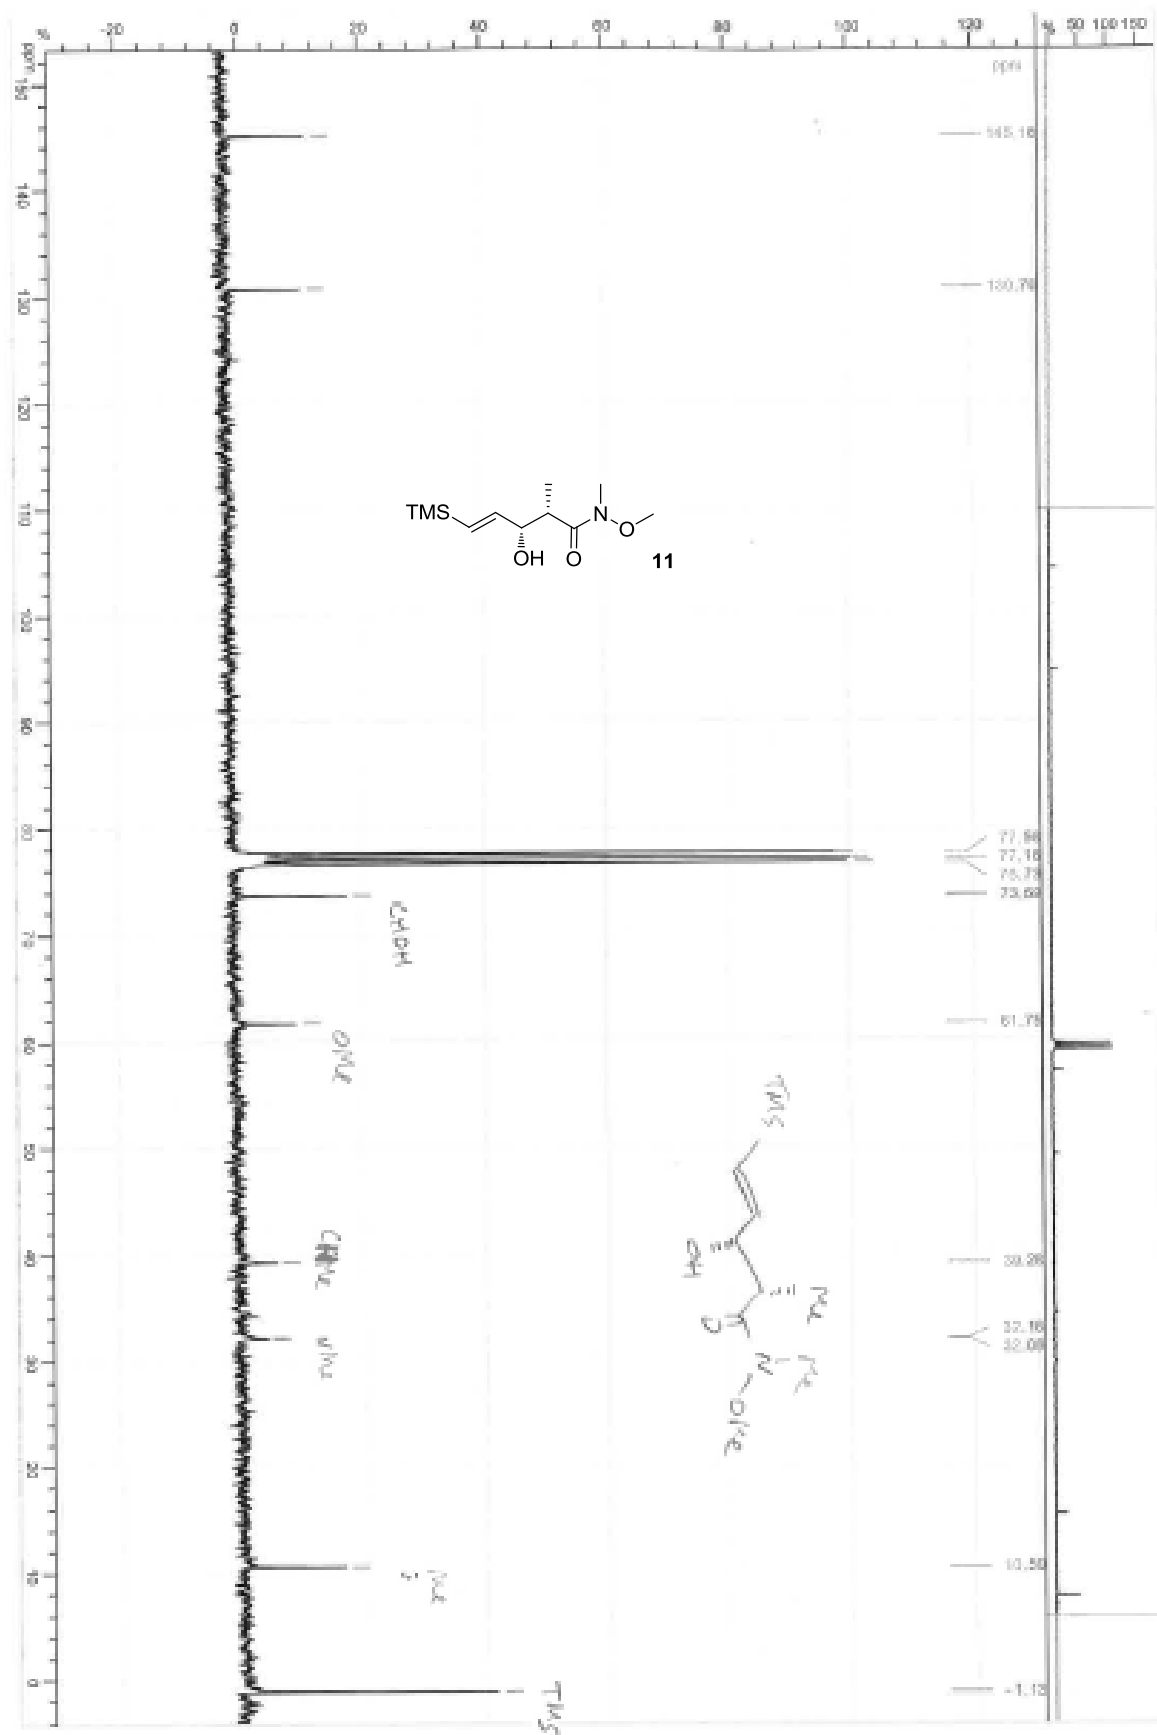

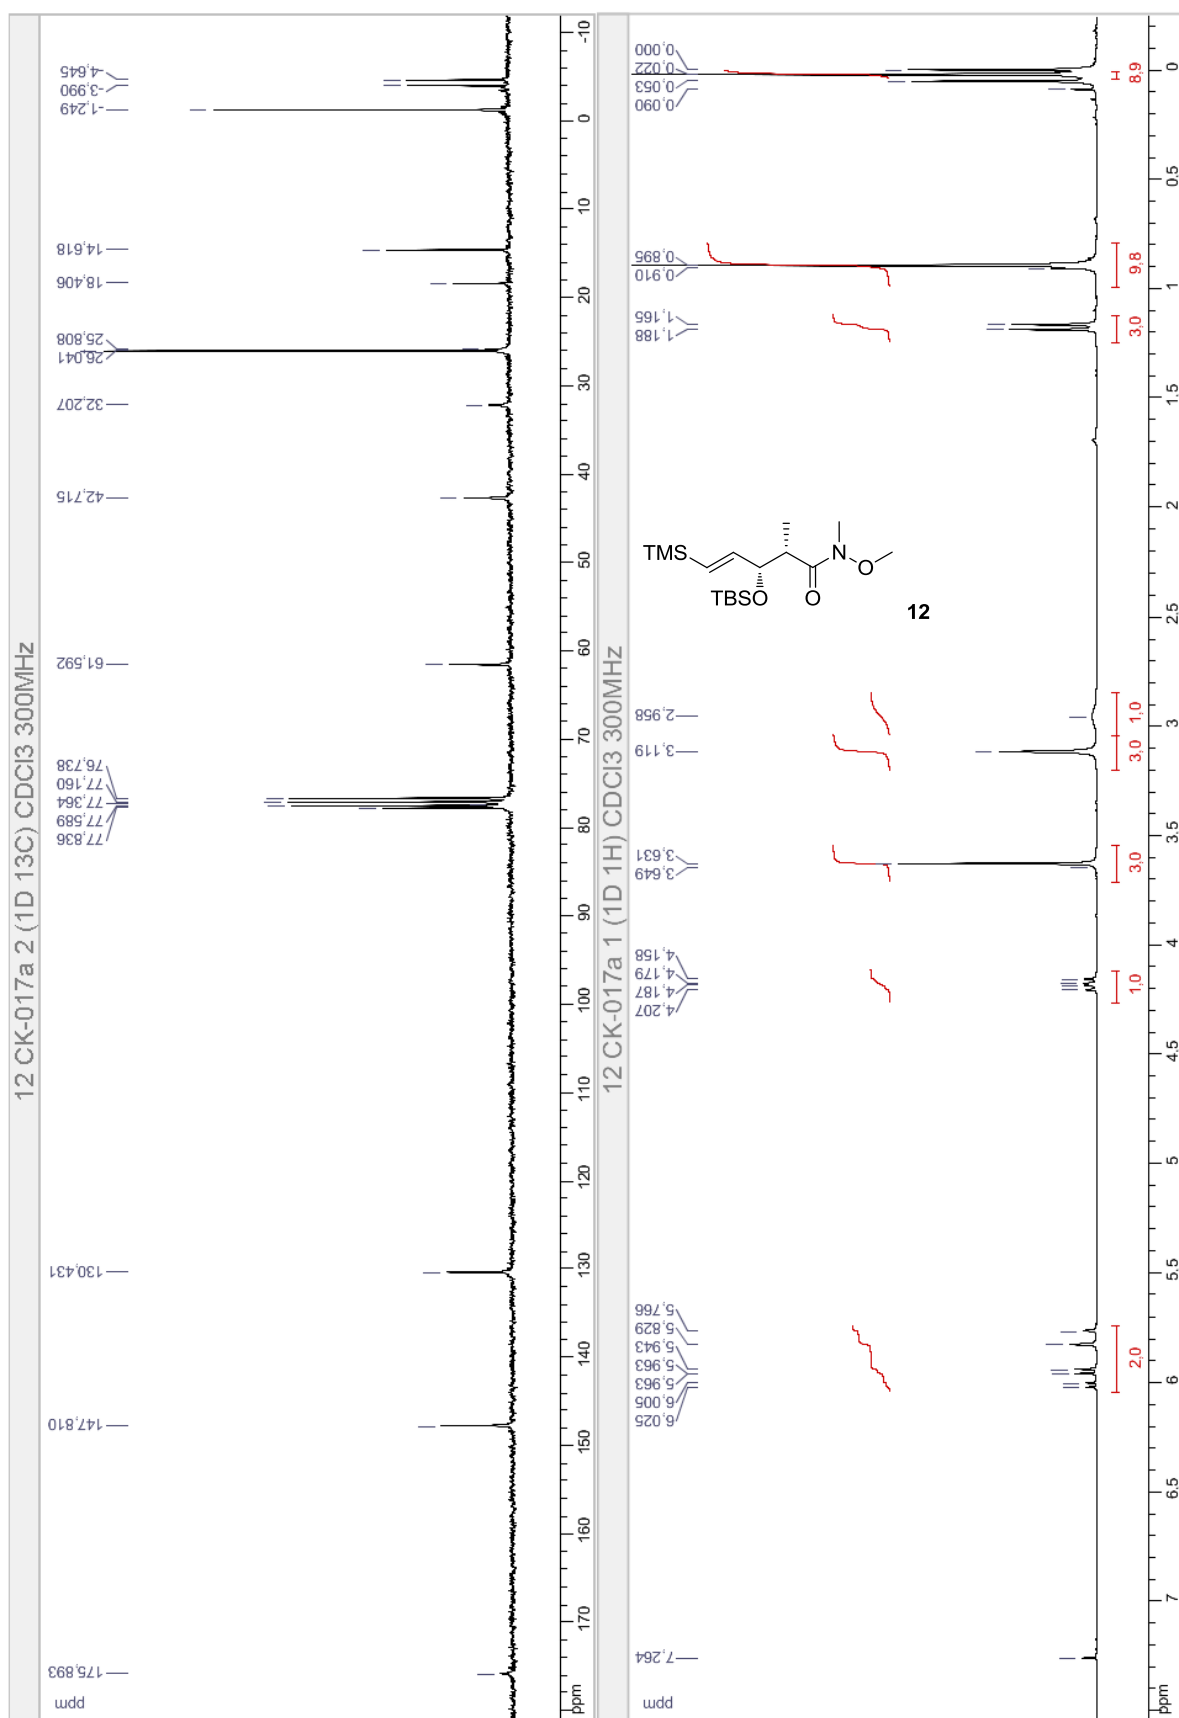



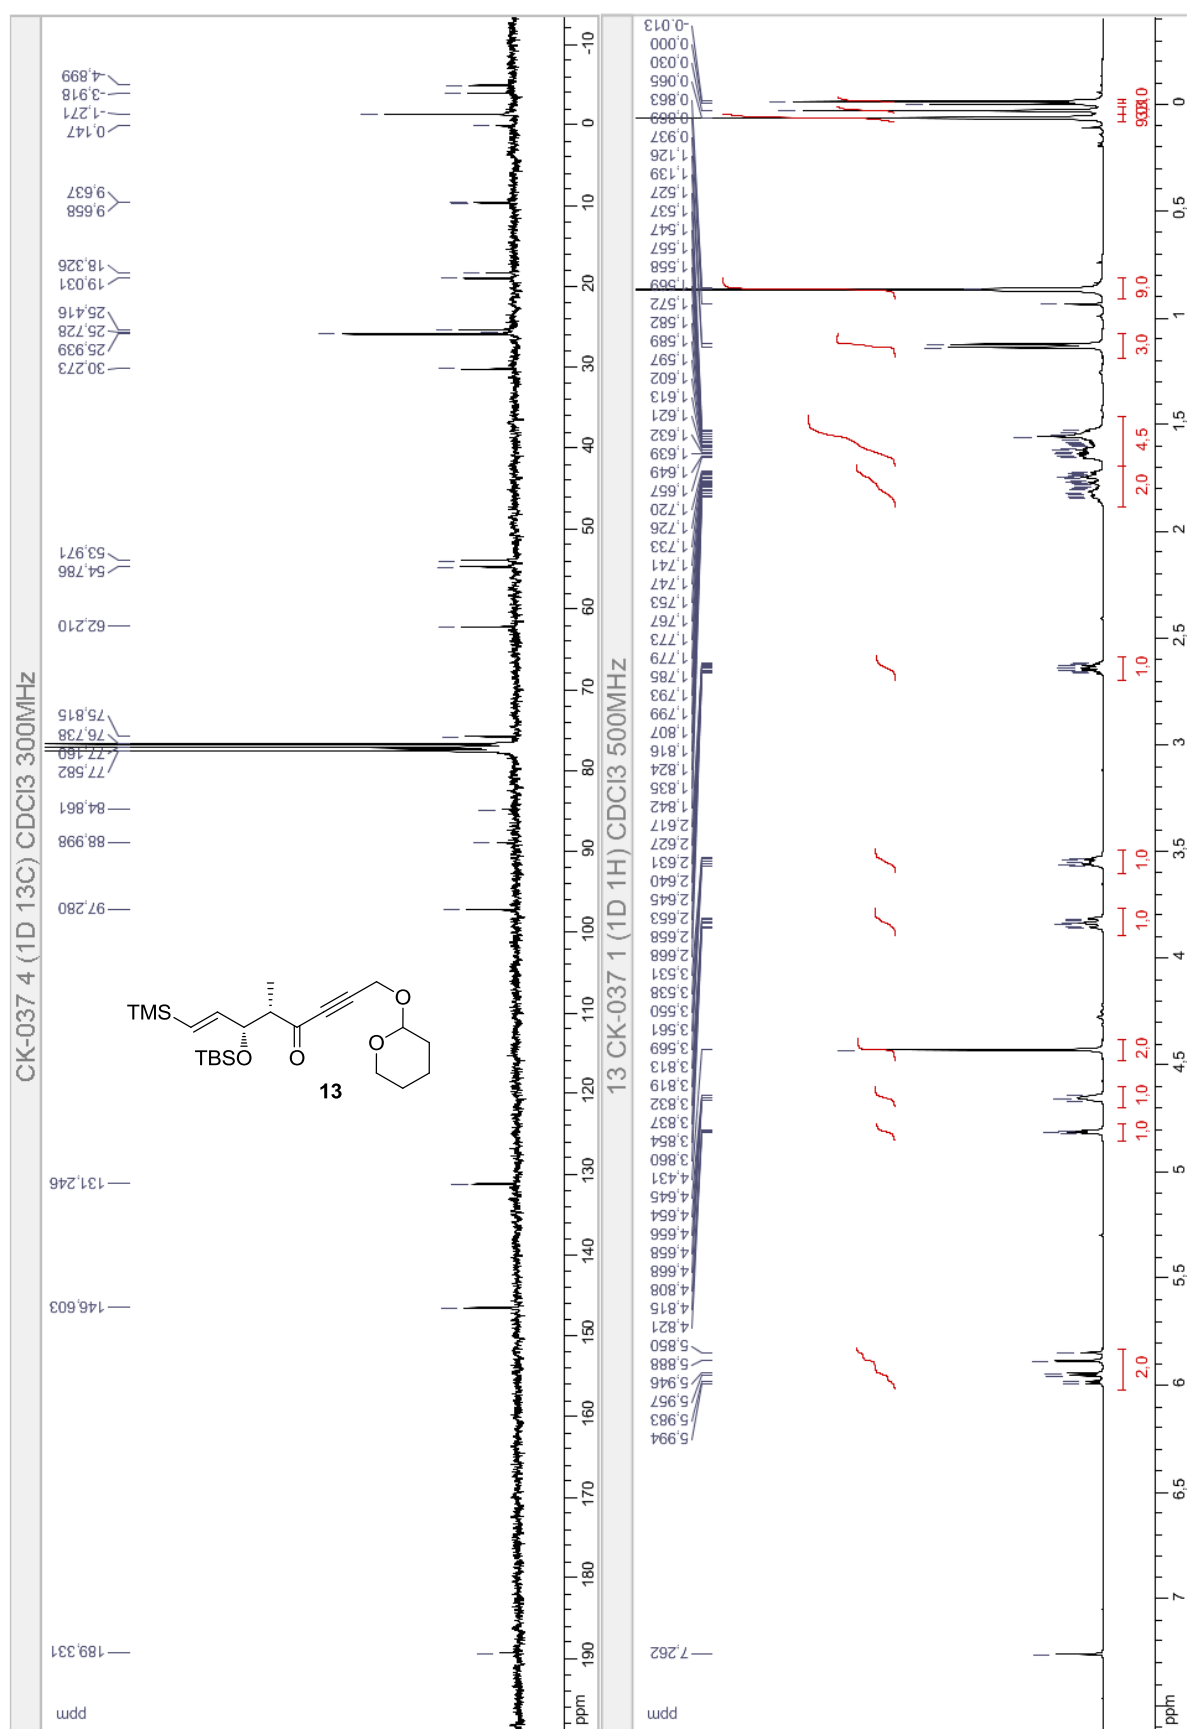

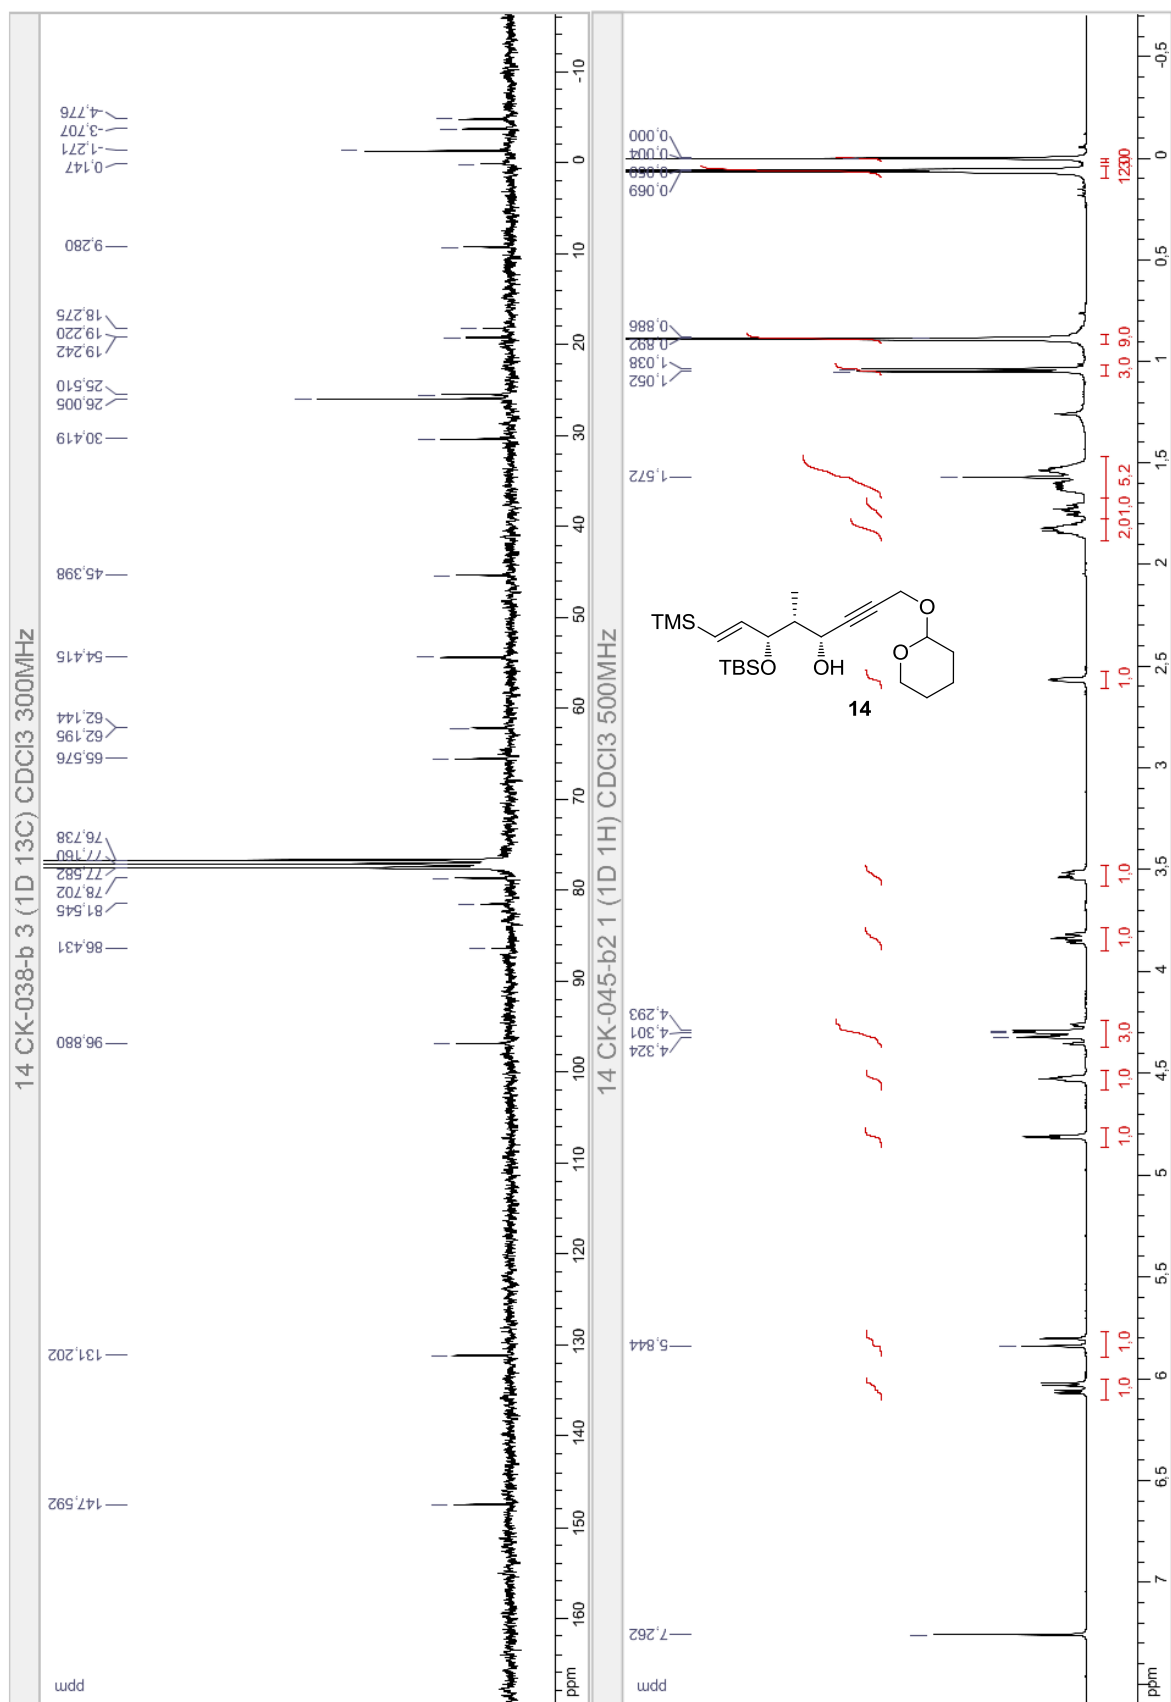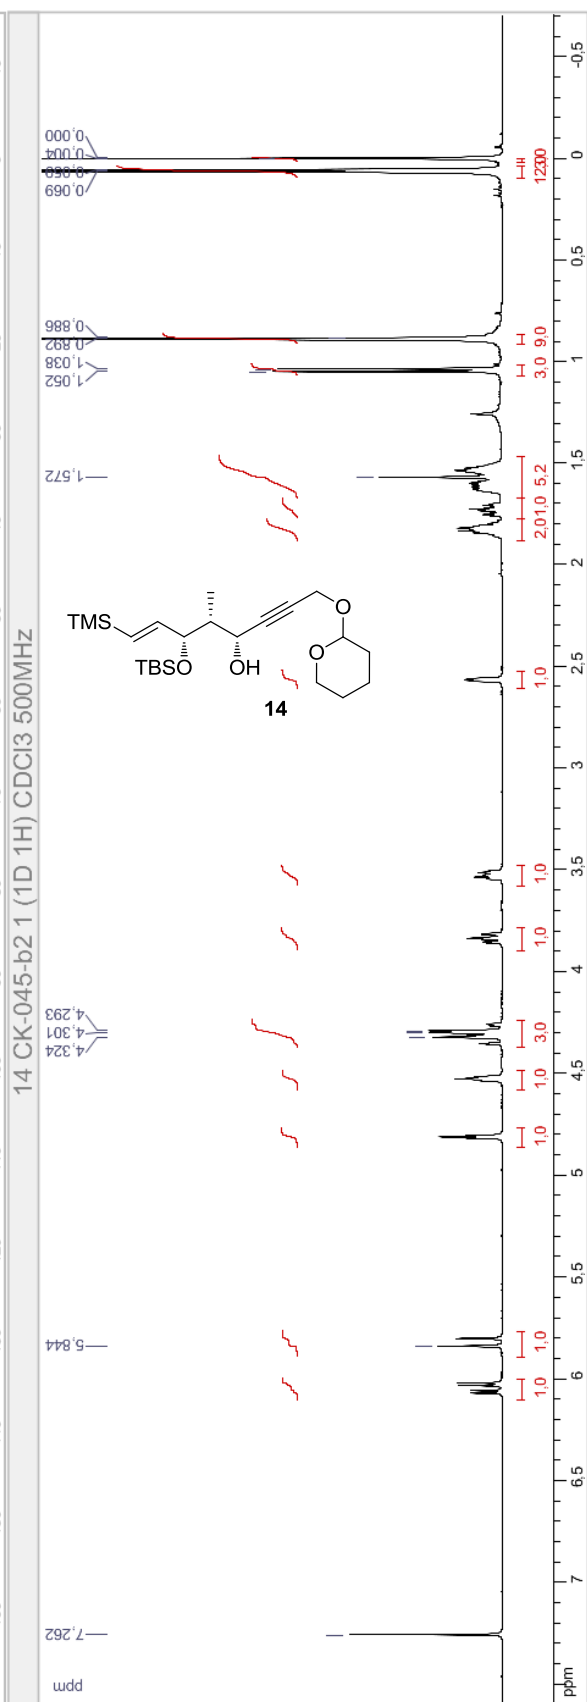





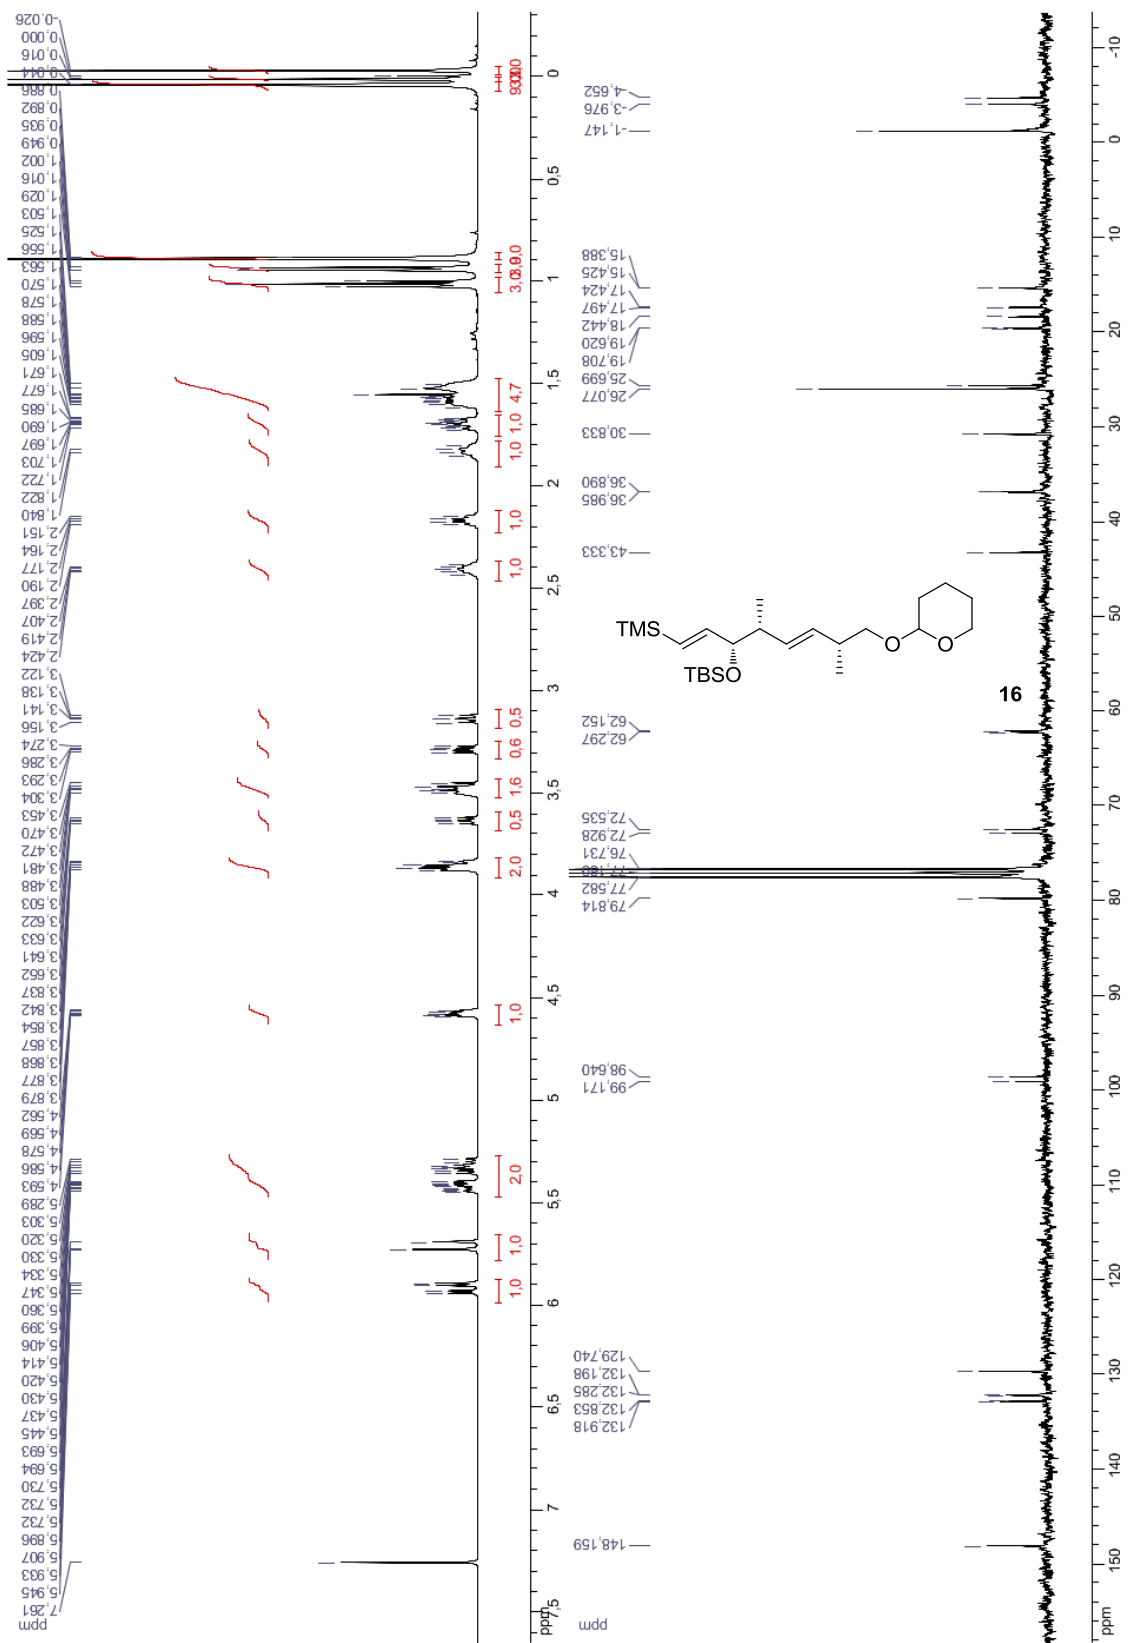

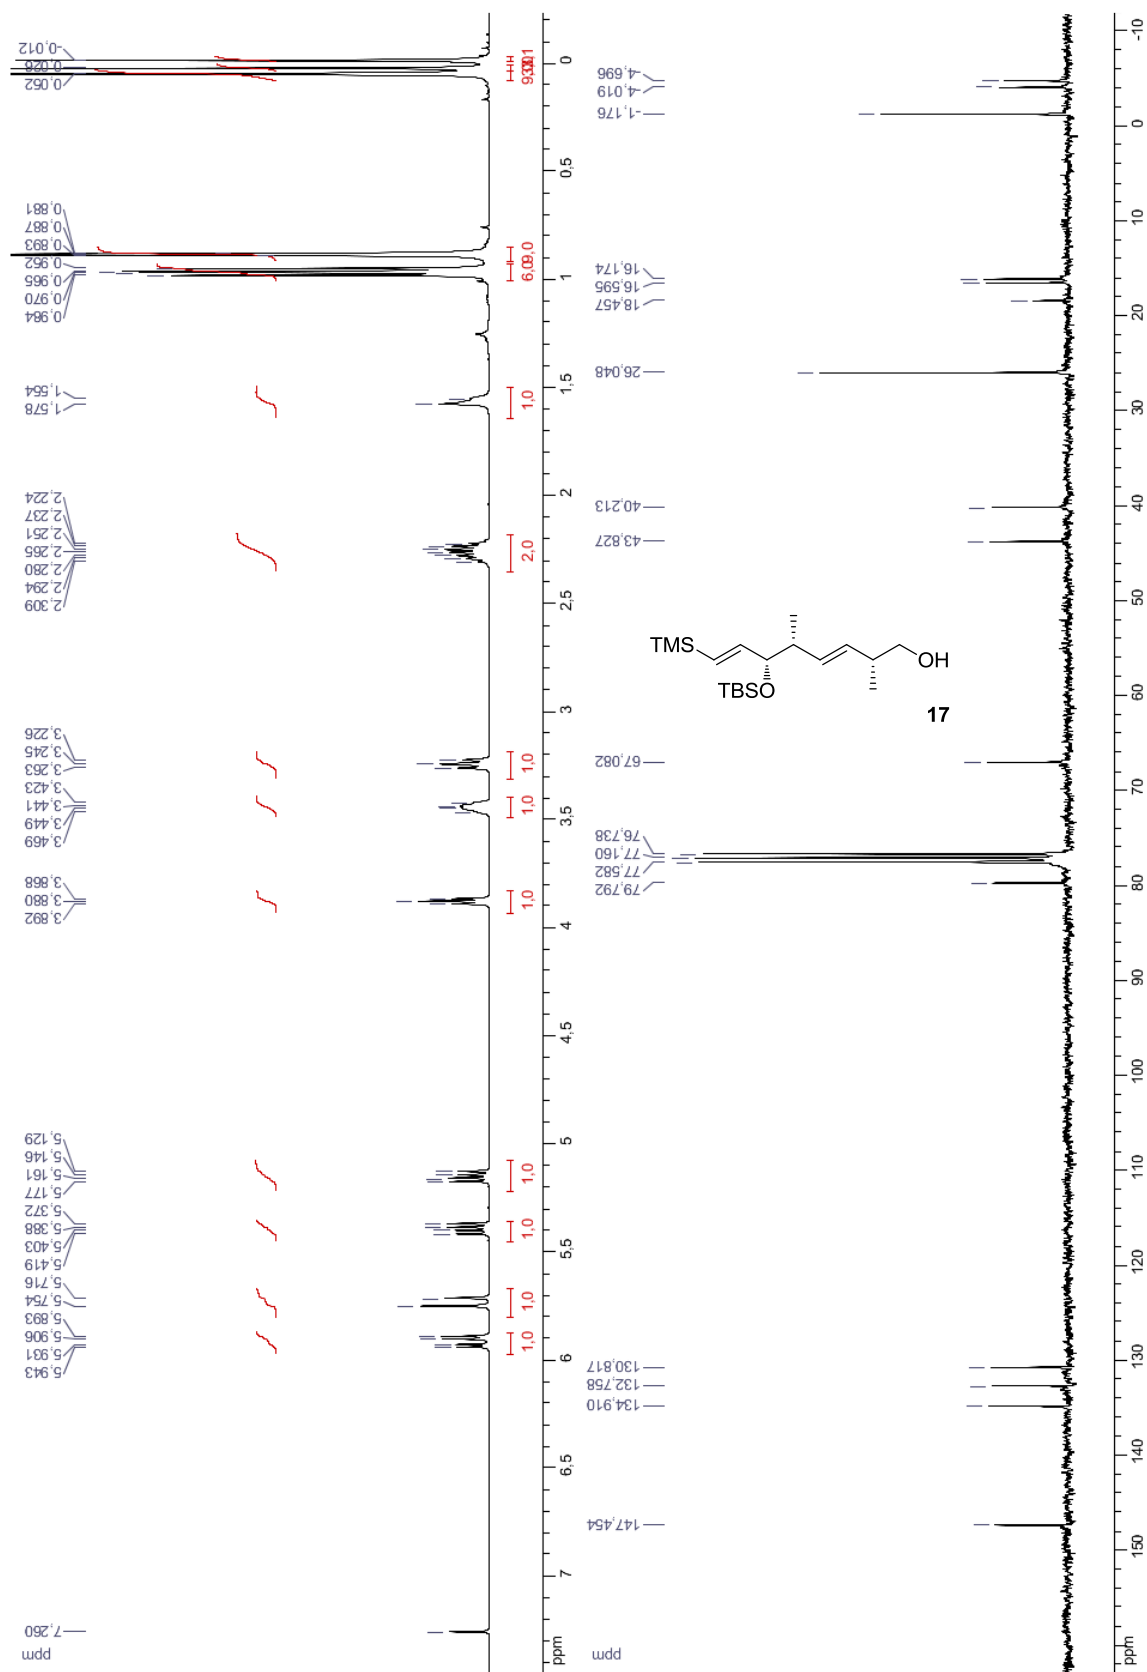



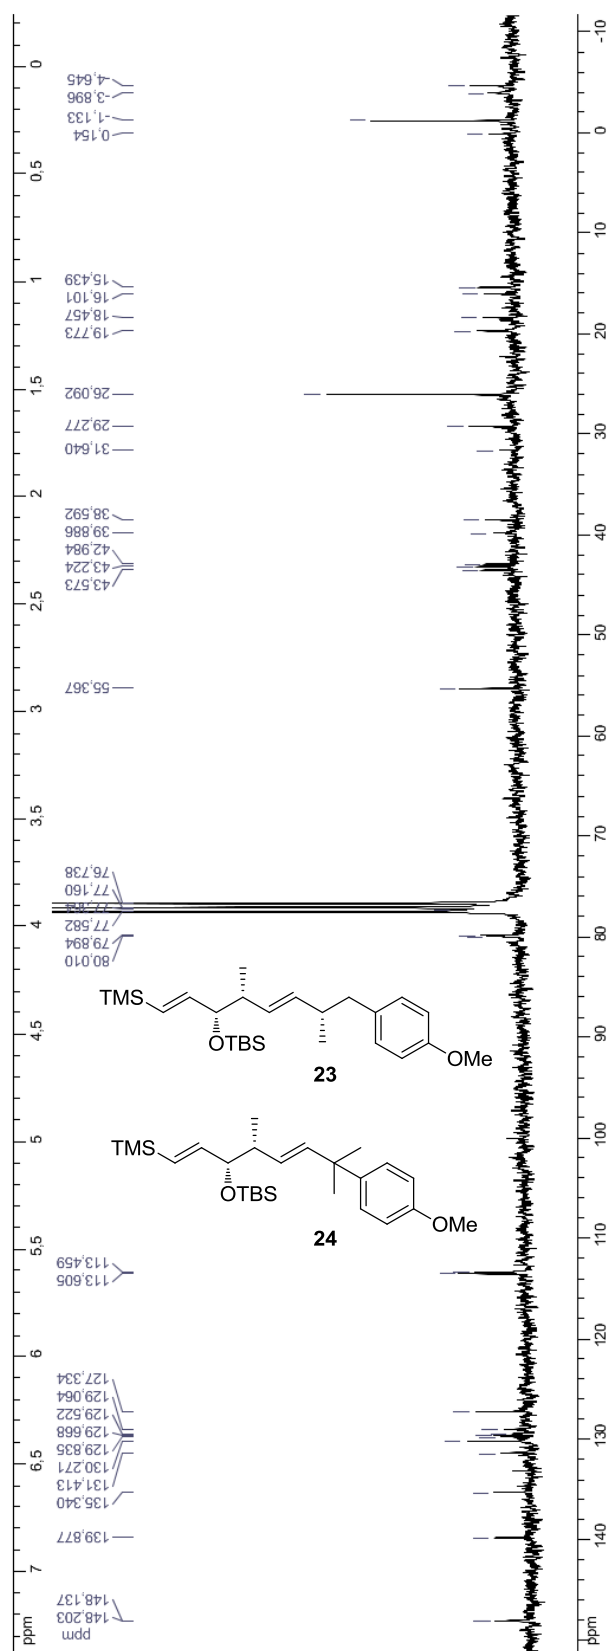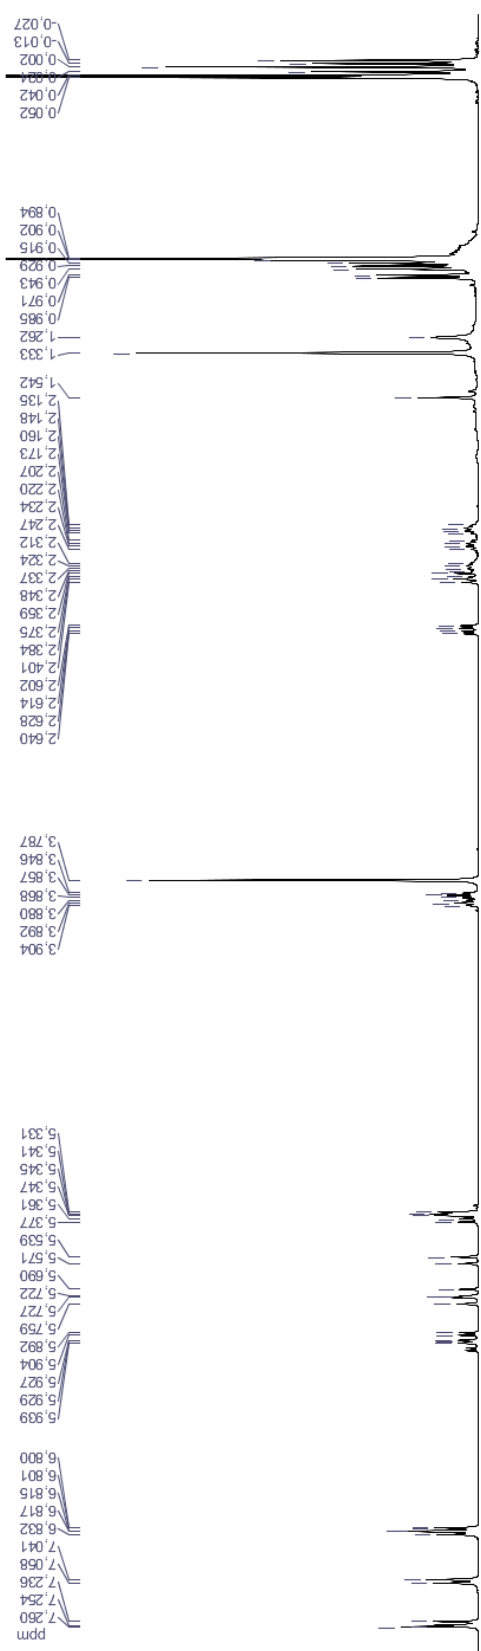



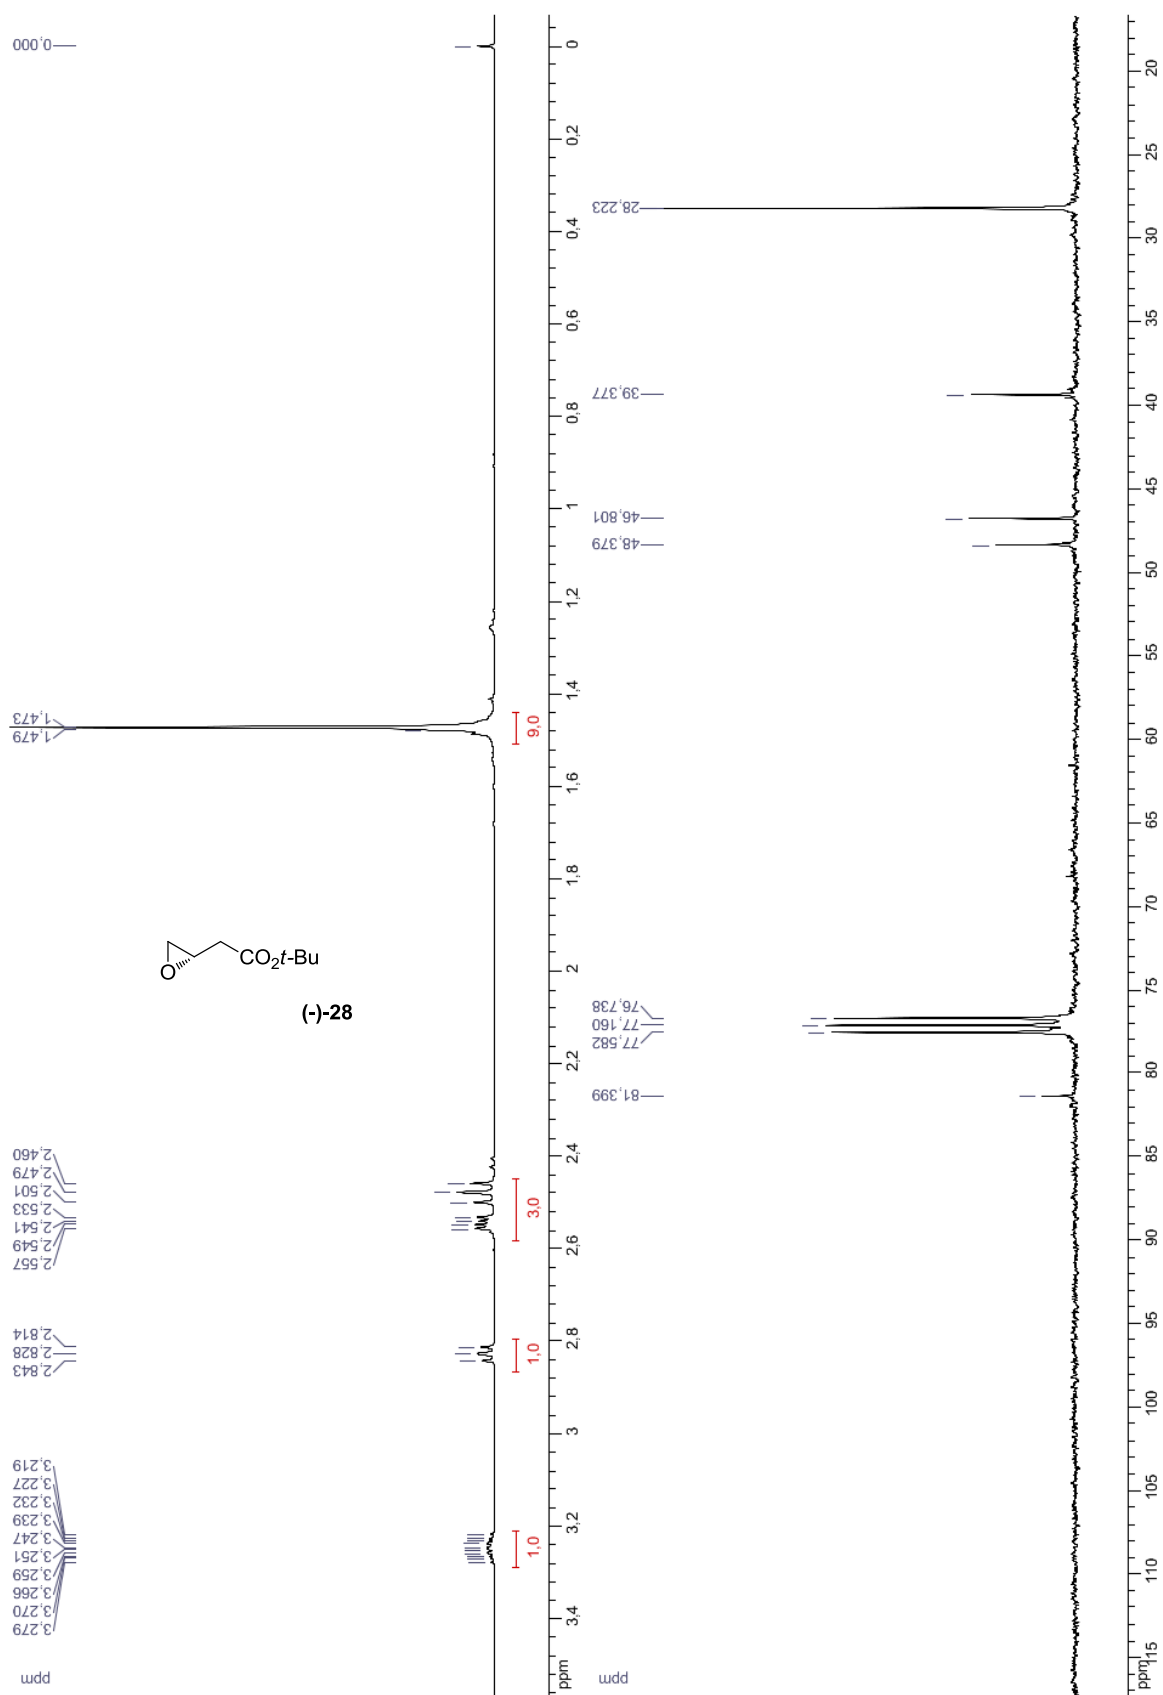

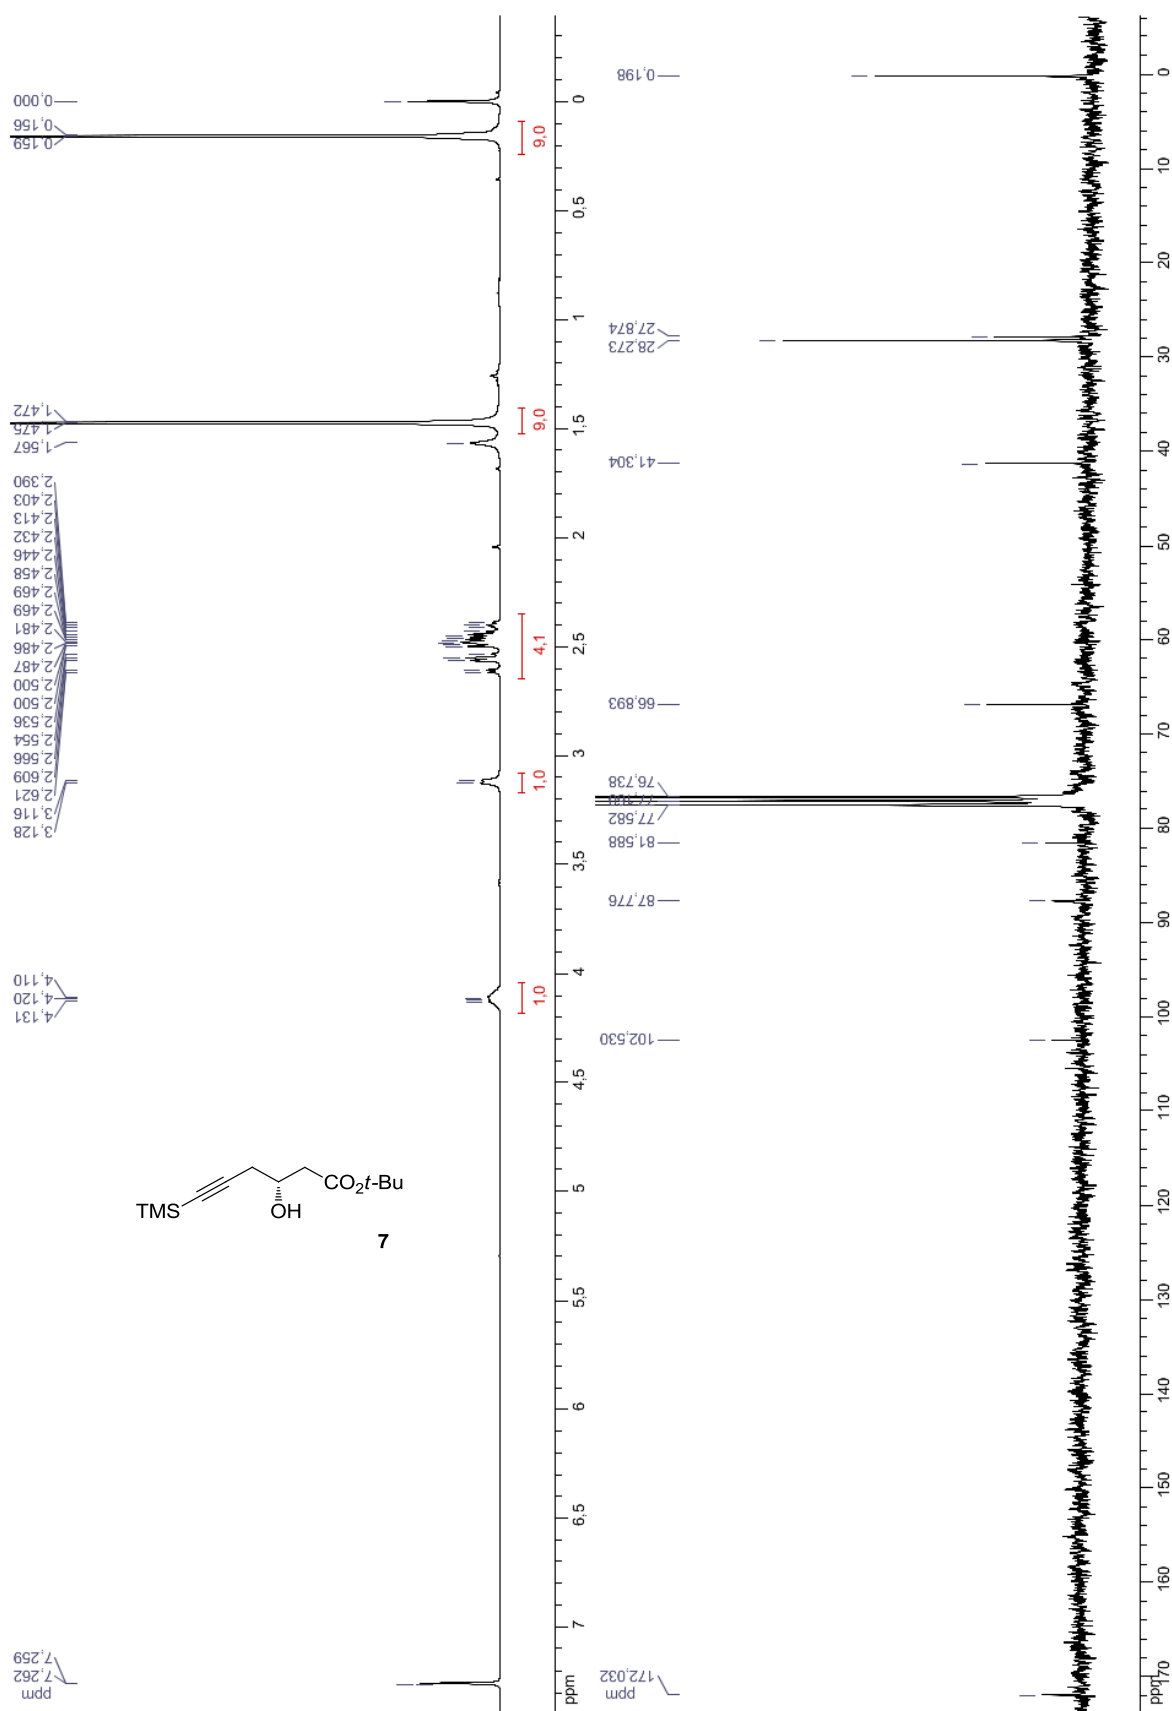

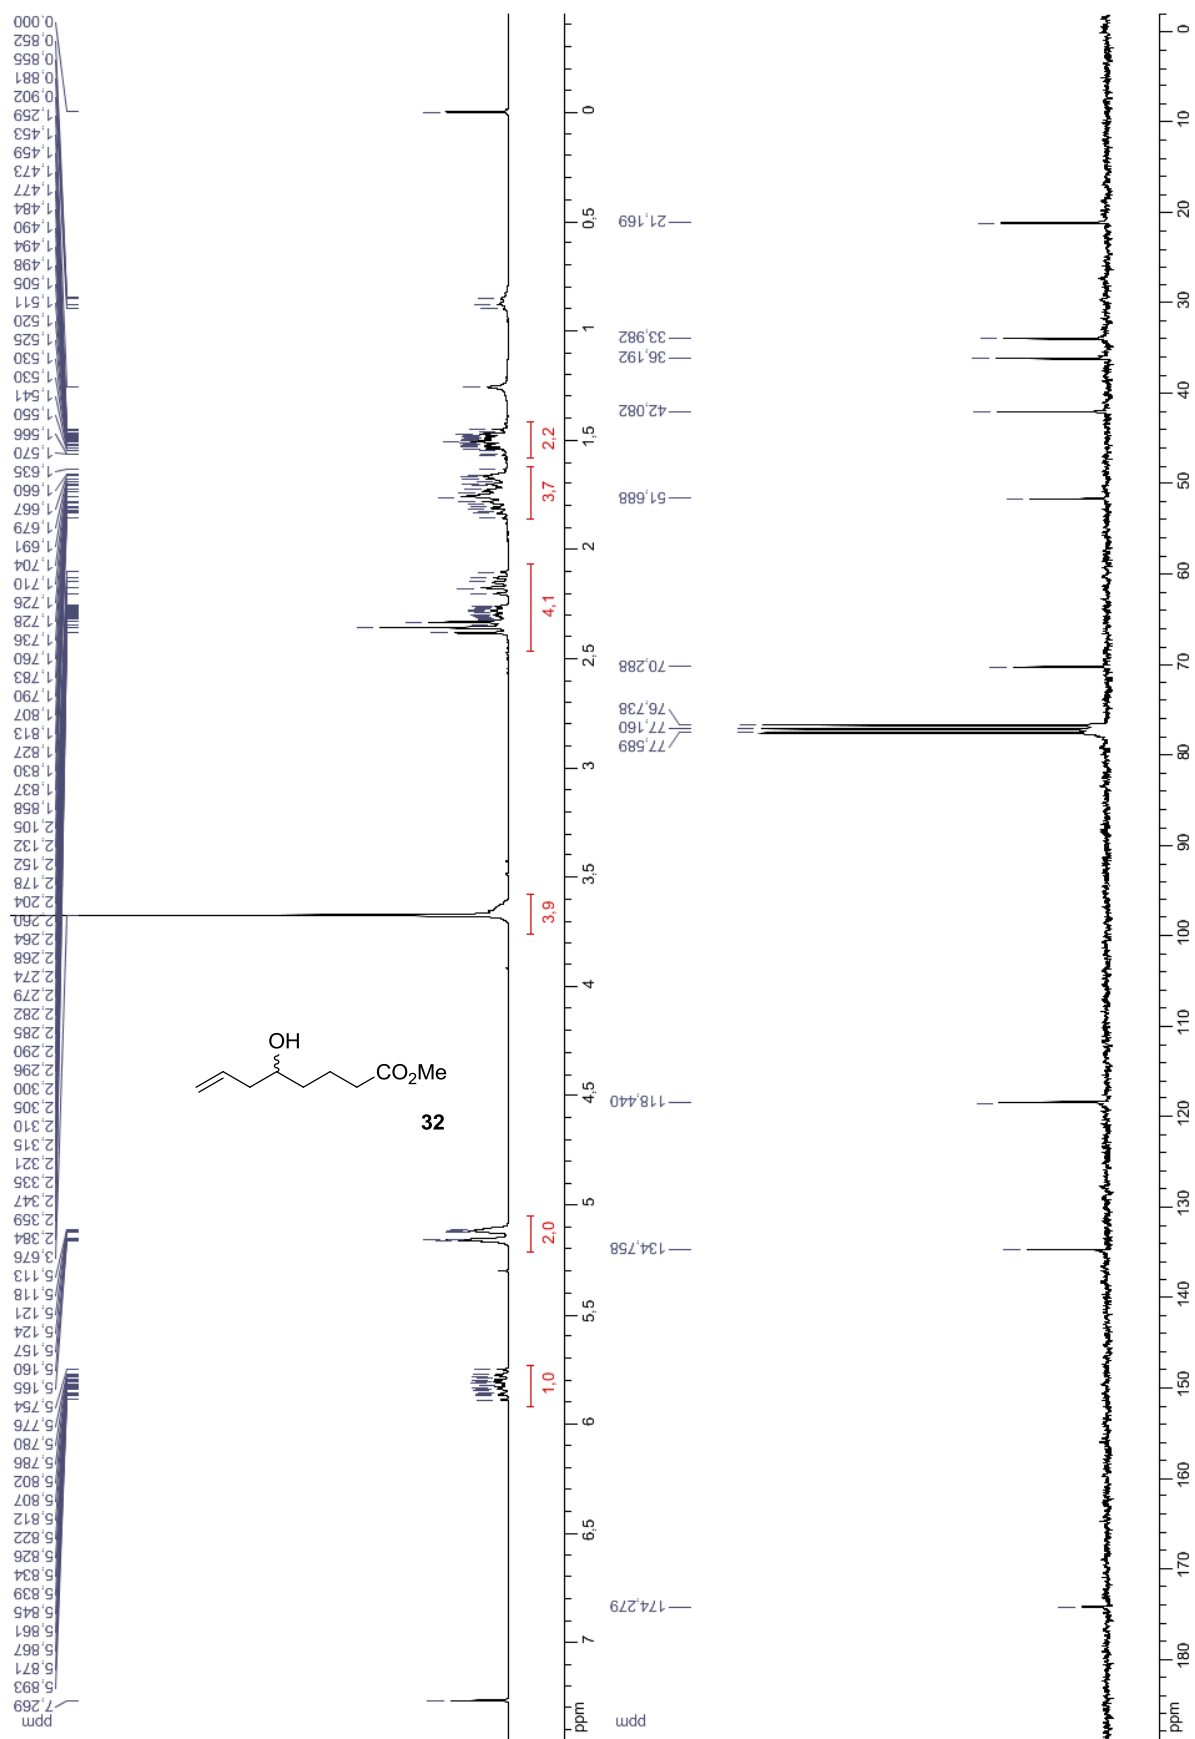

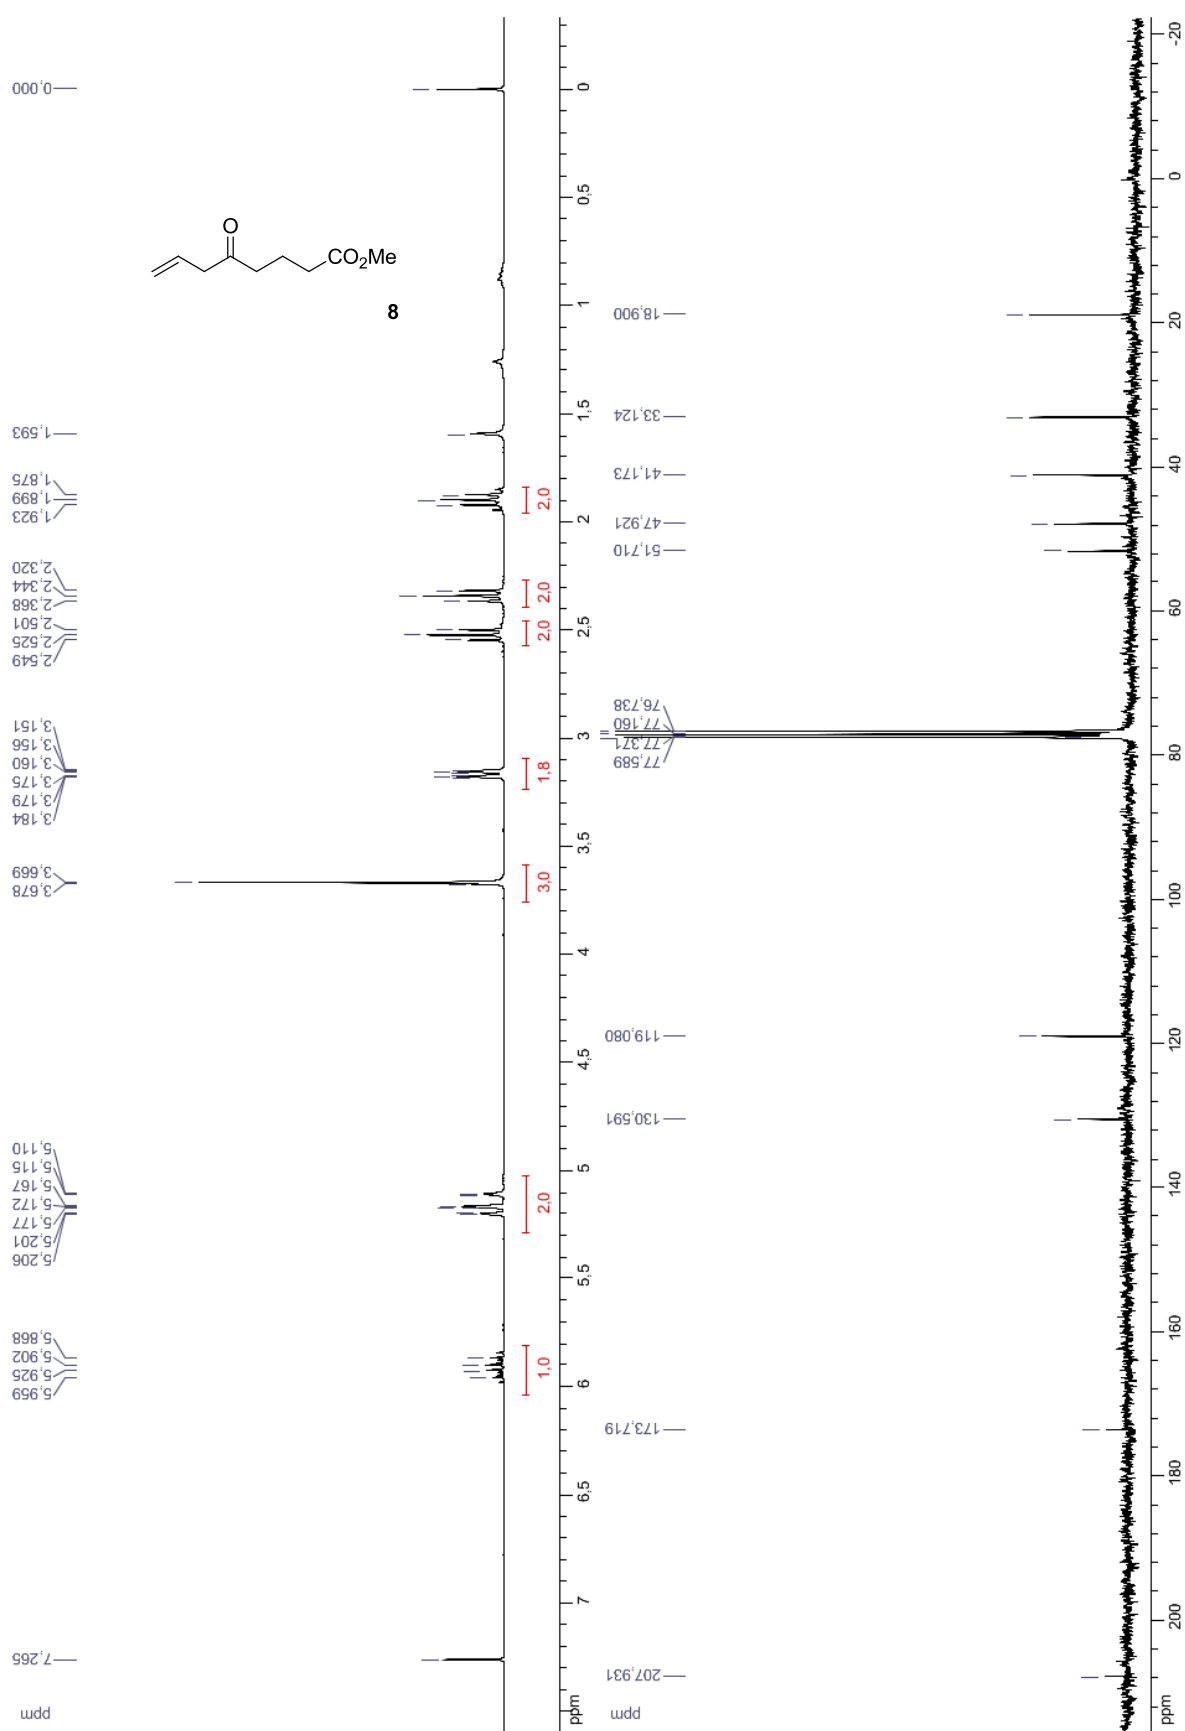

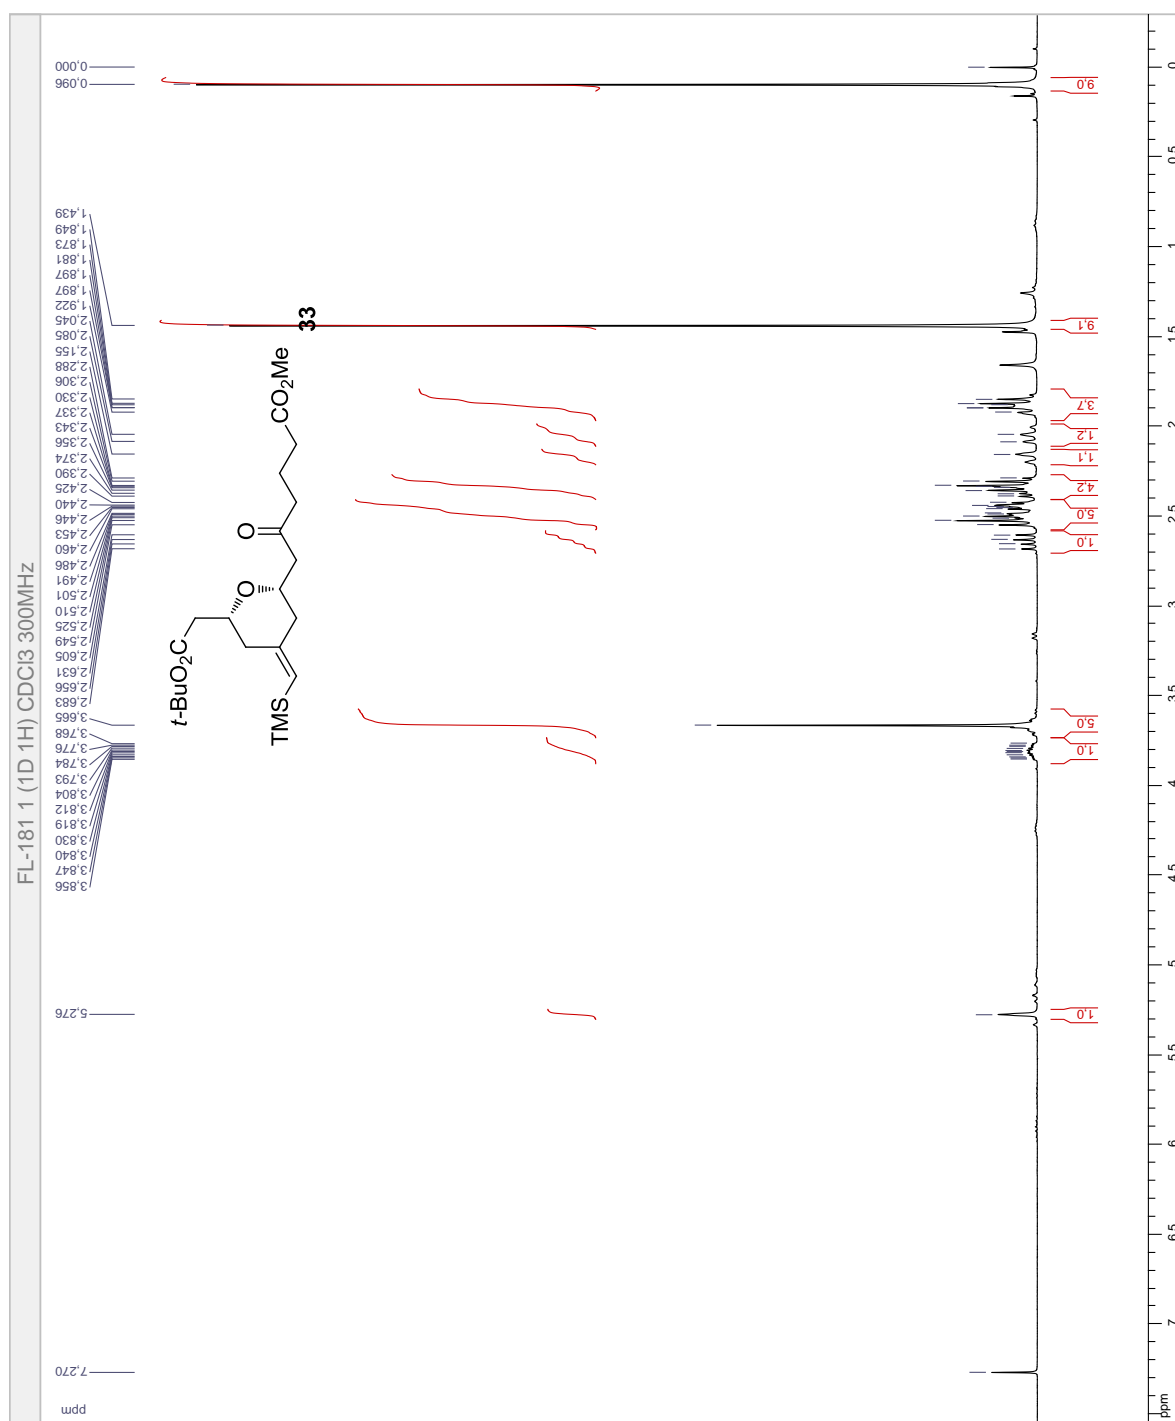

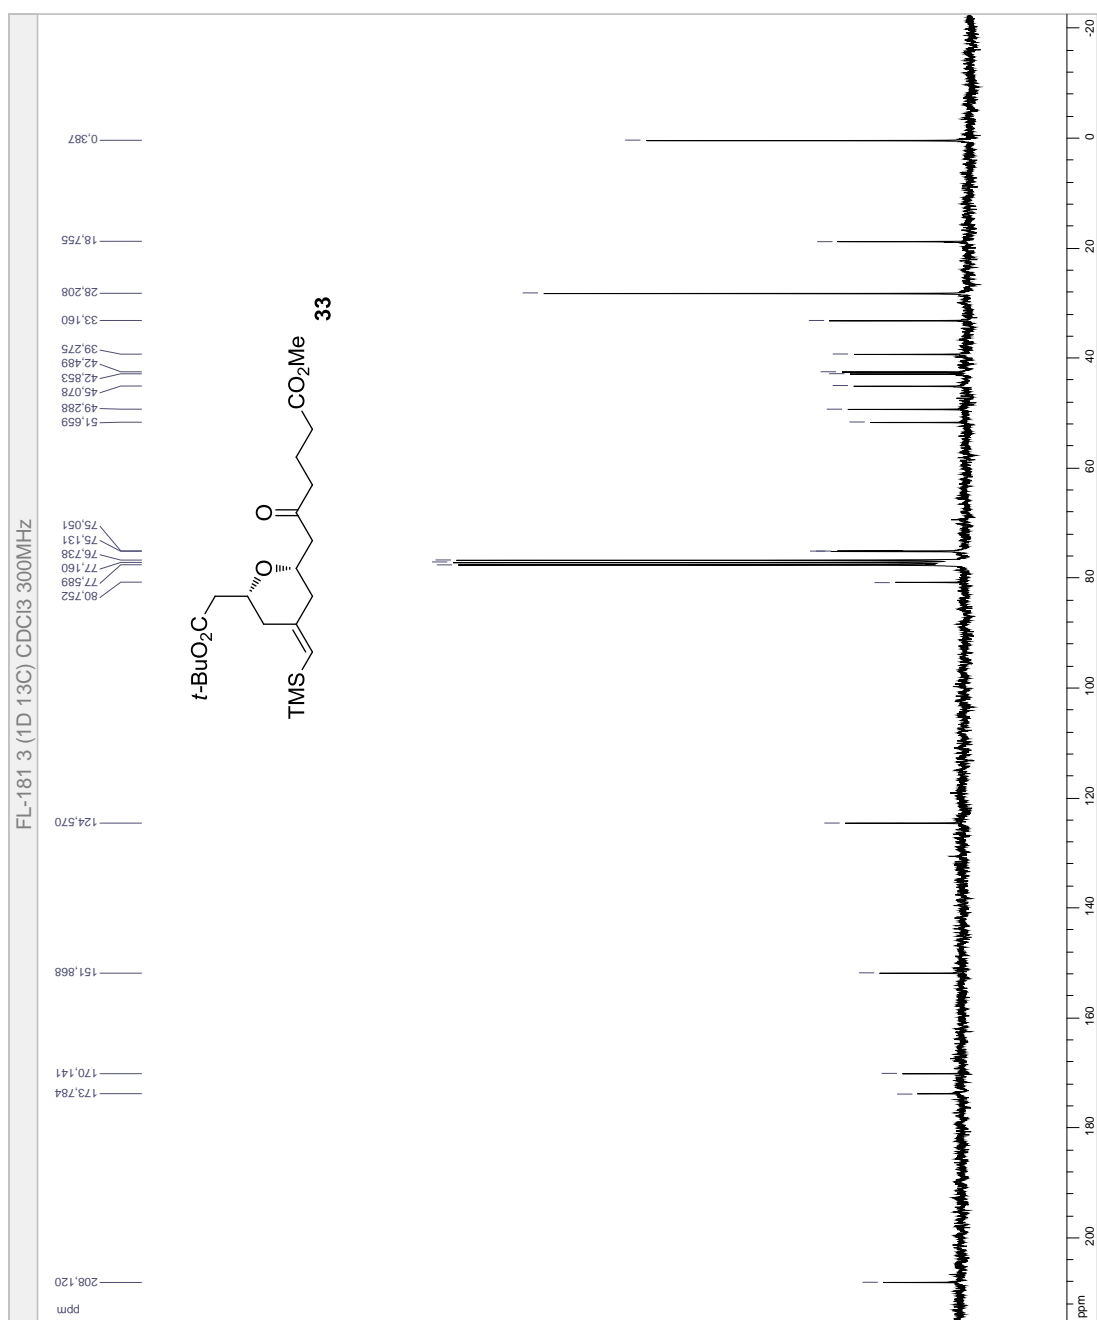

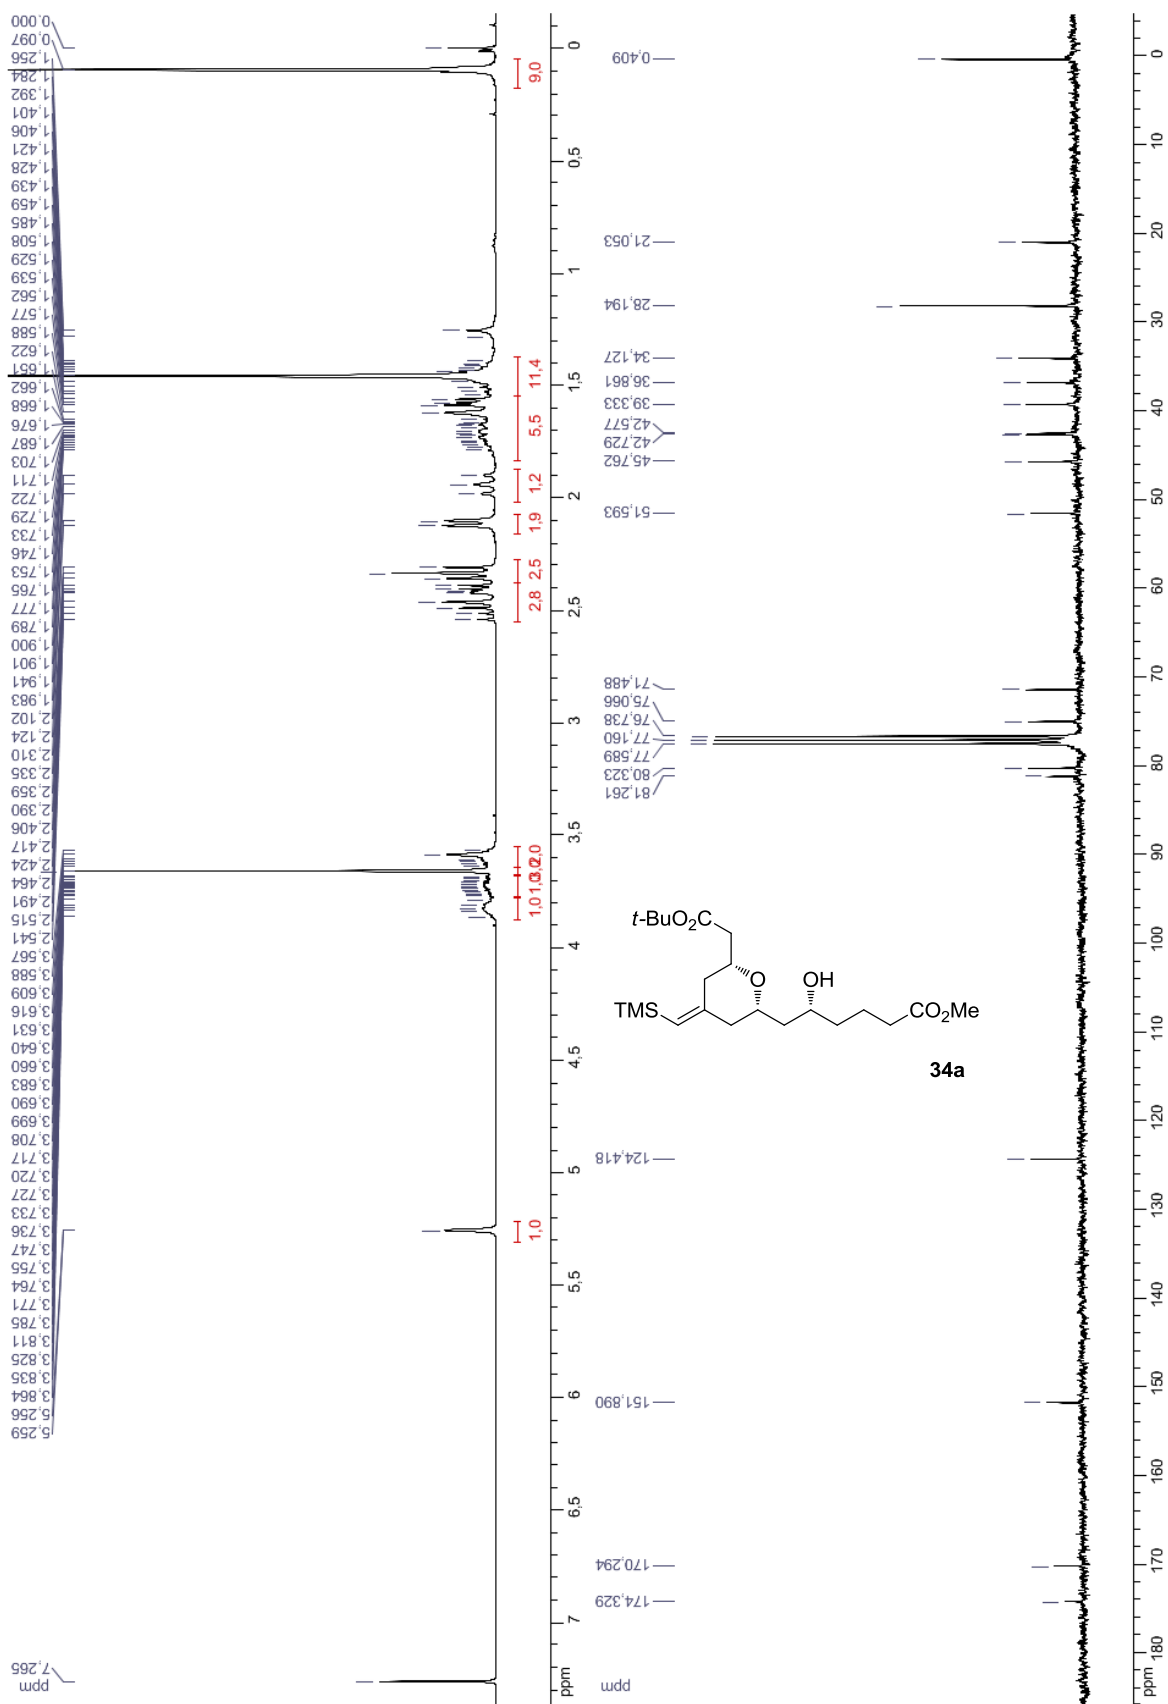

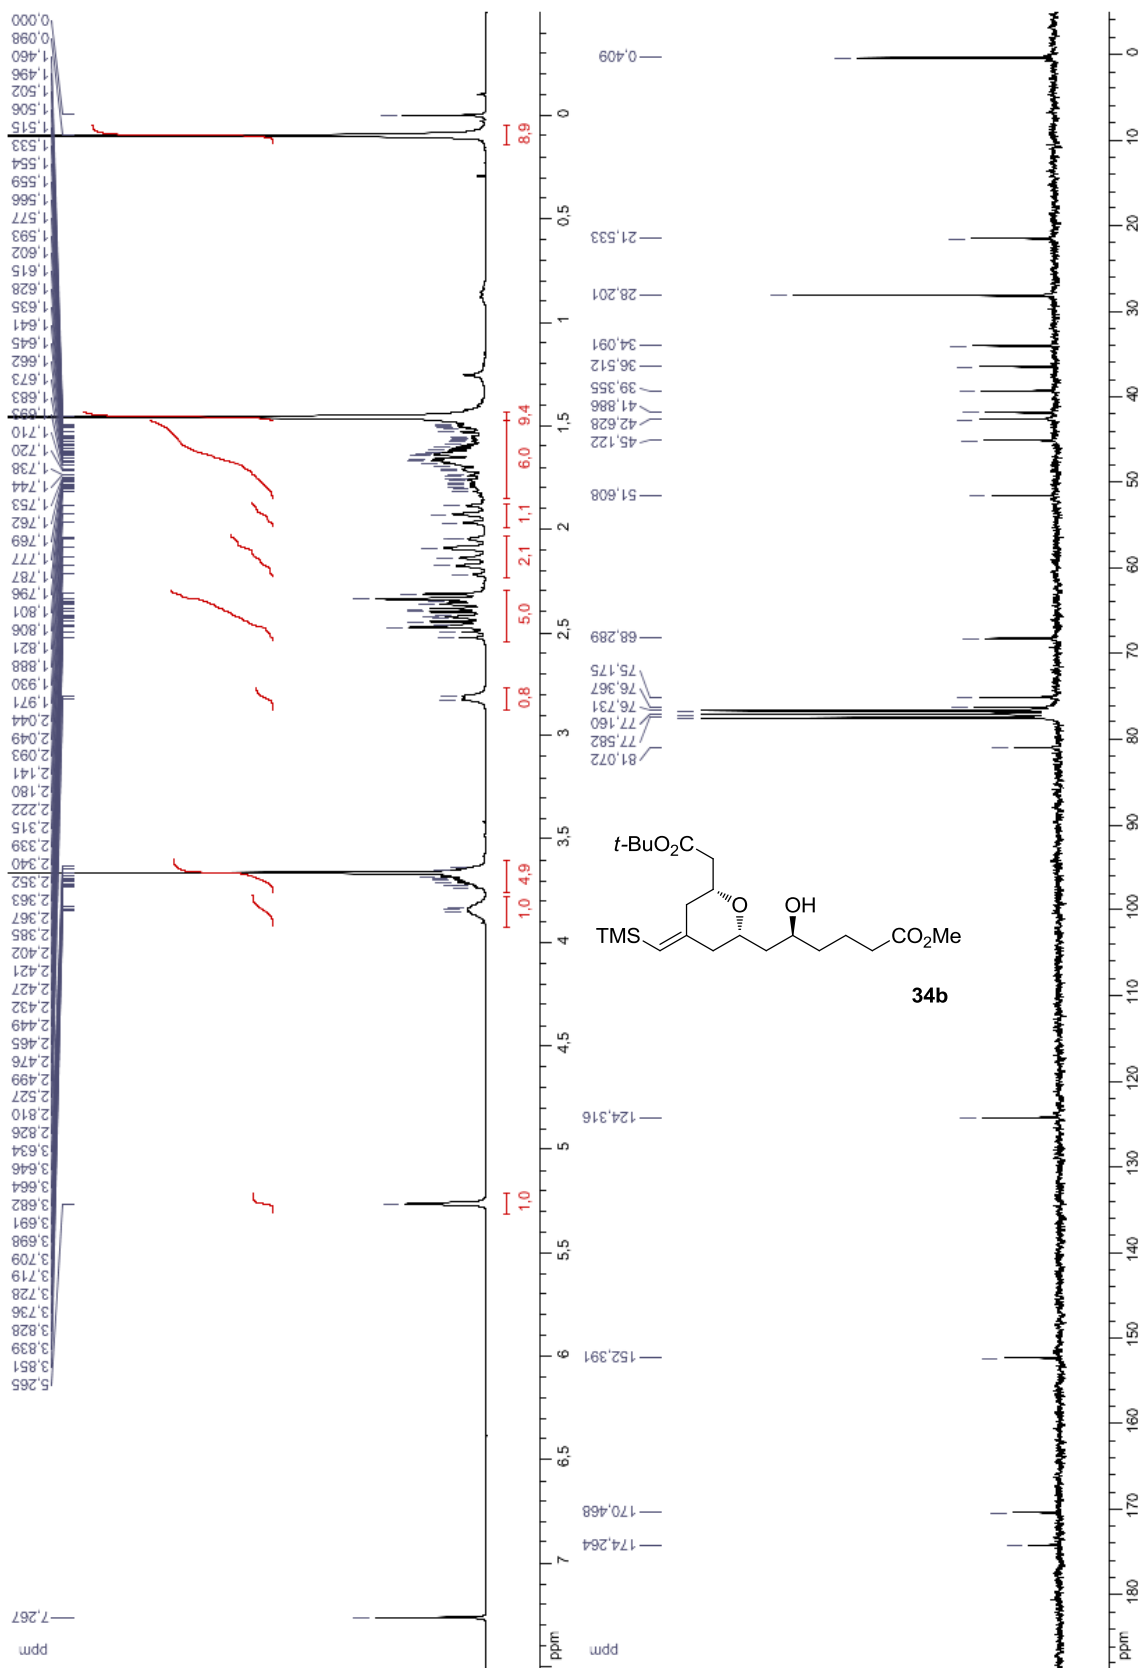



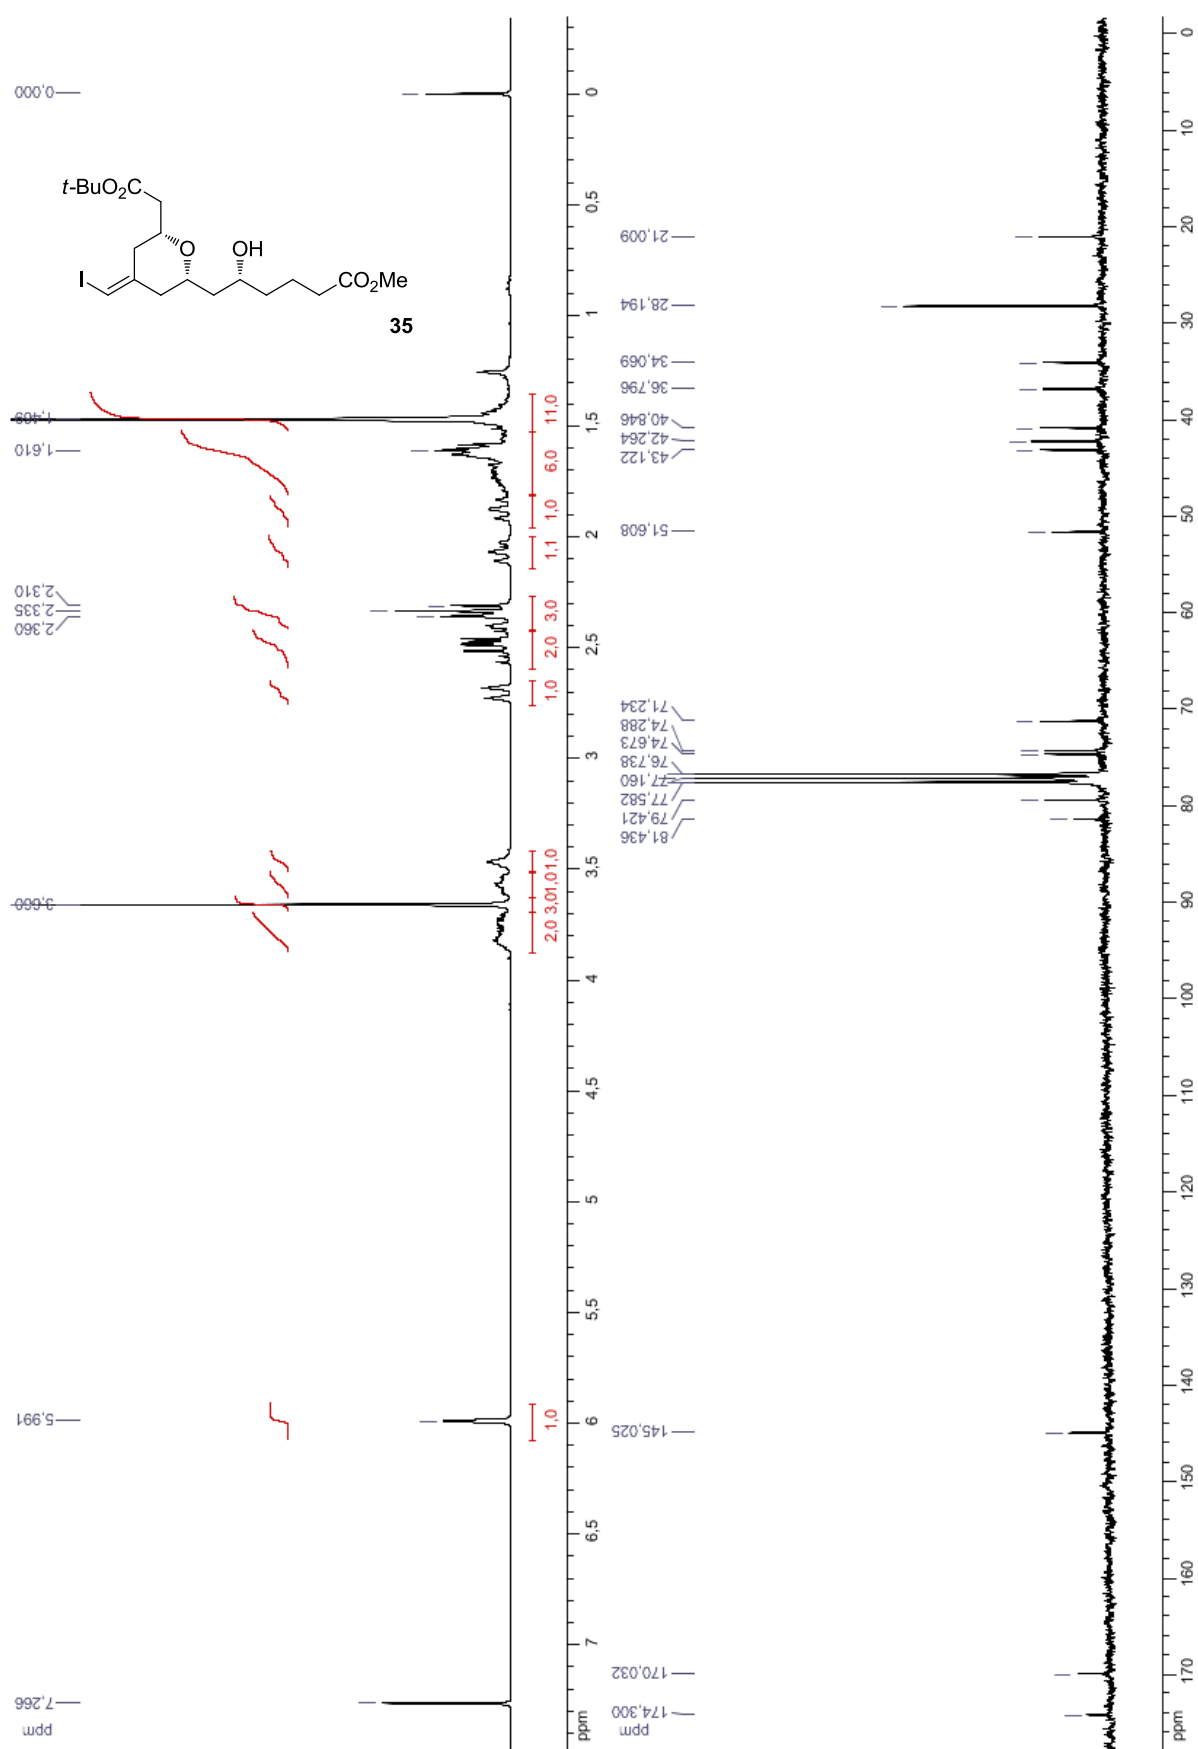

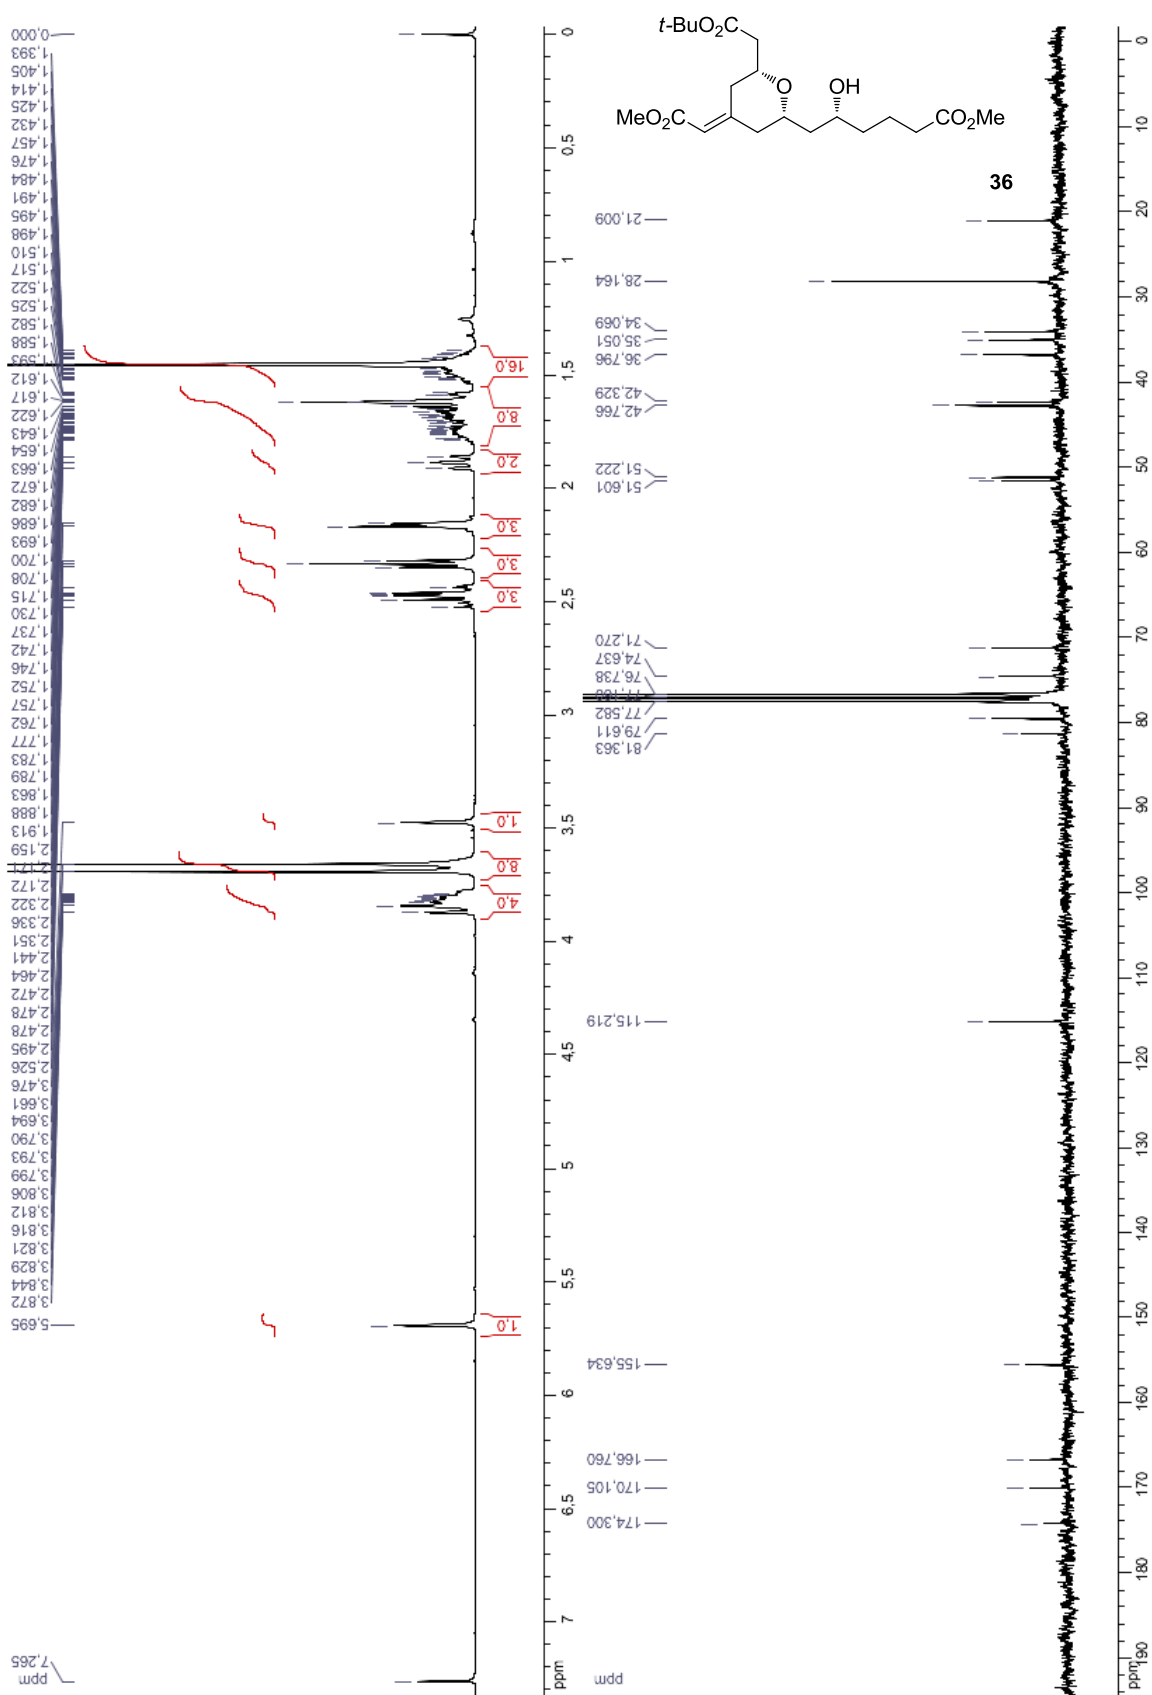

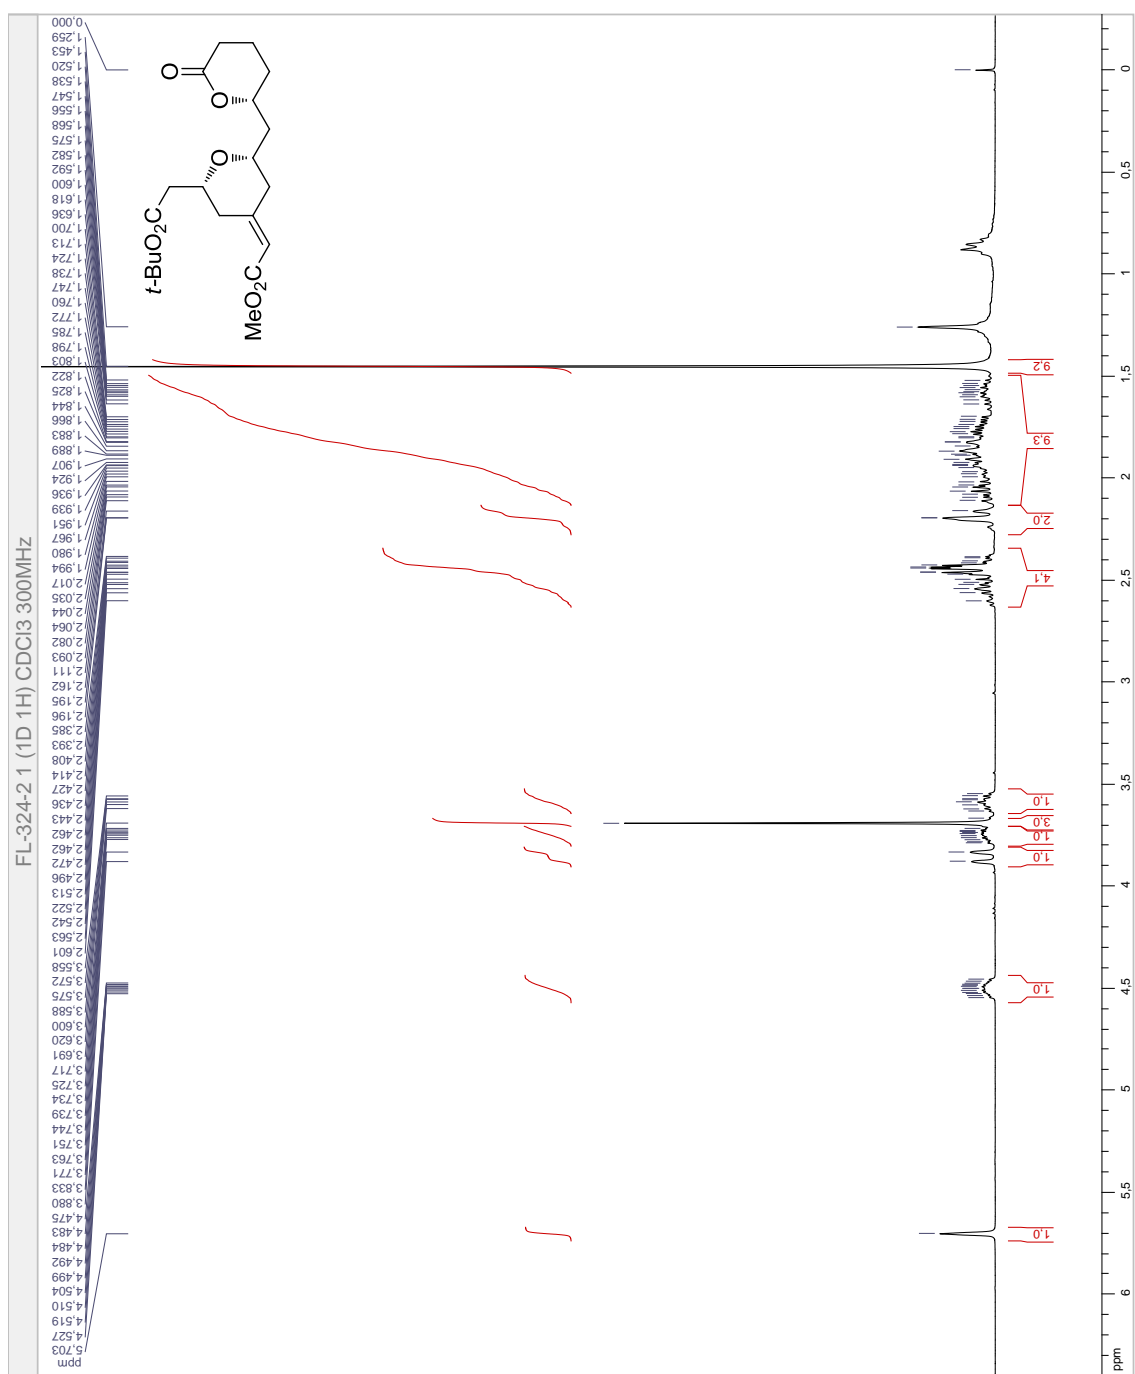

37

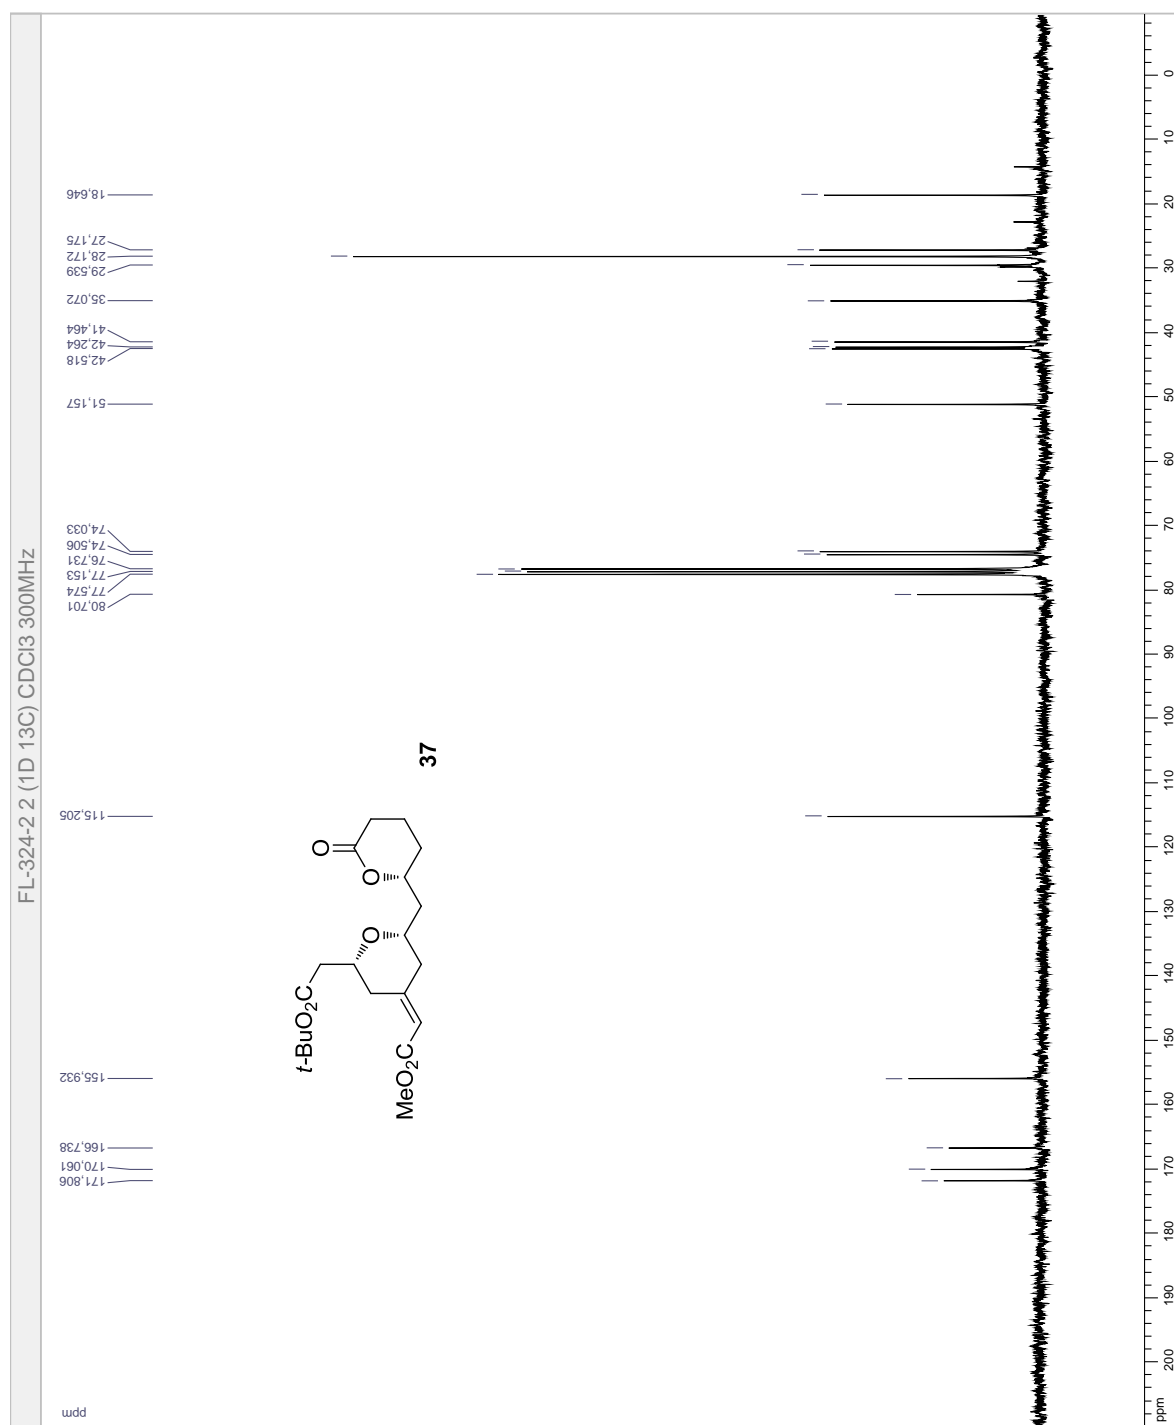

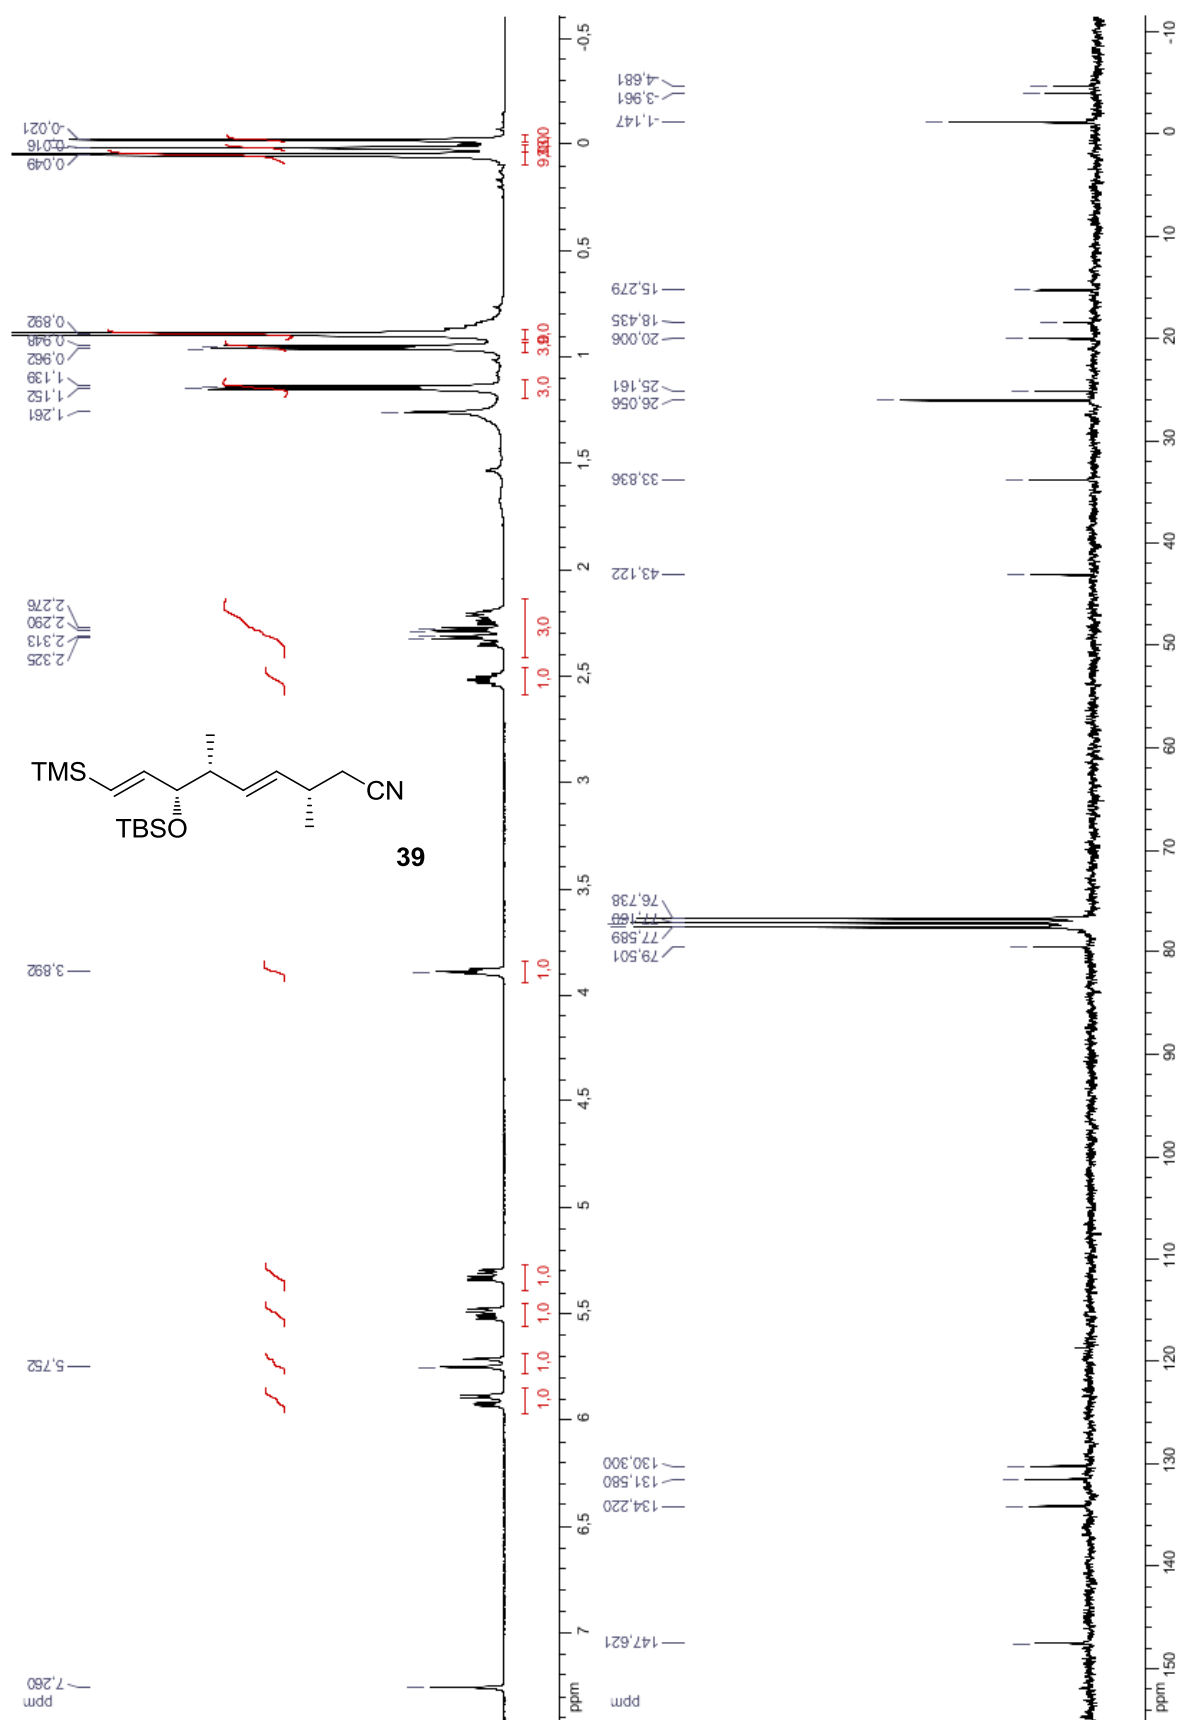



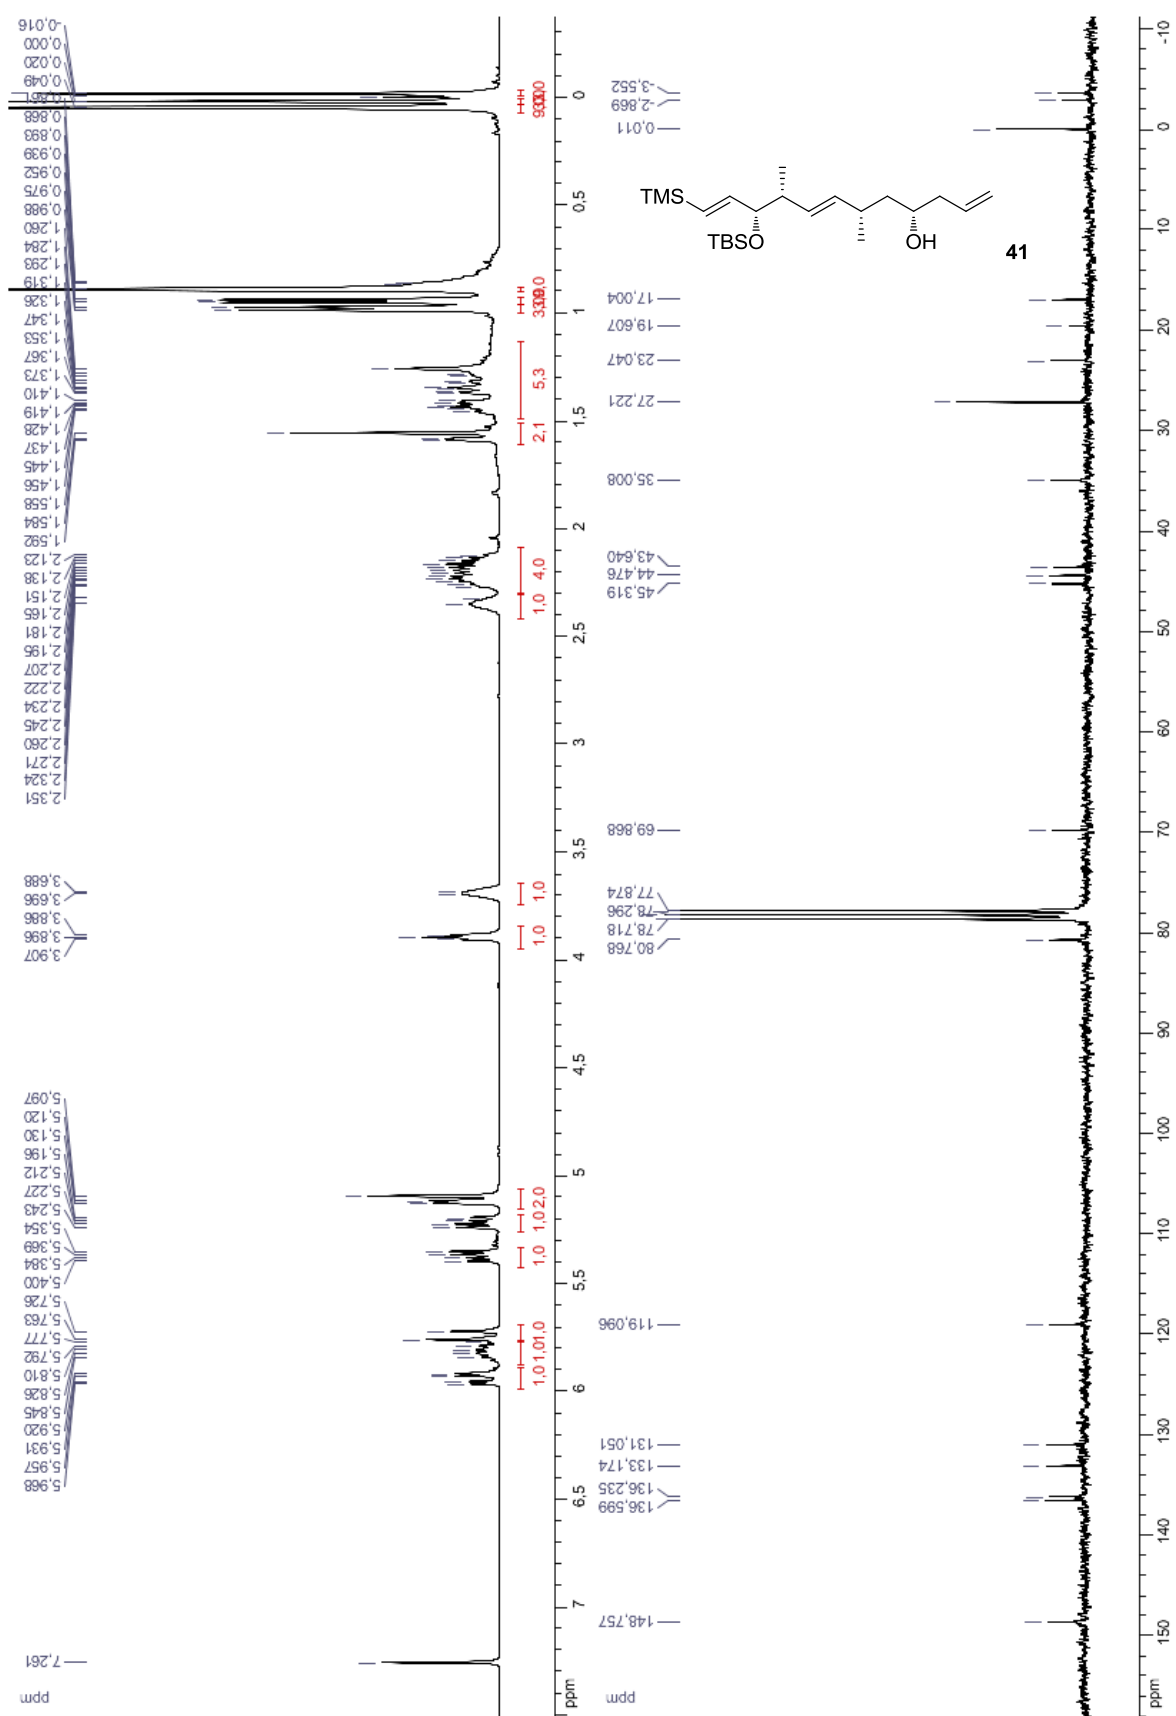

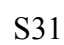





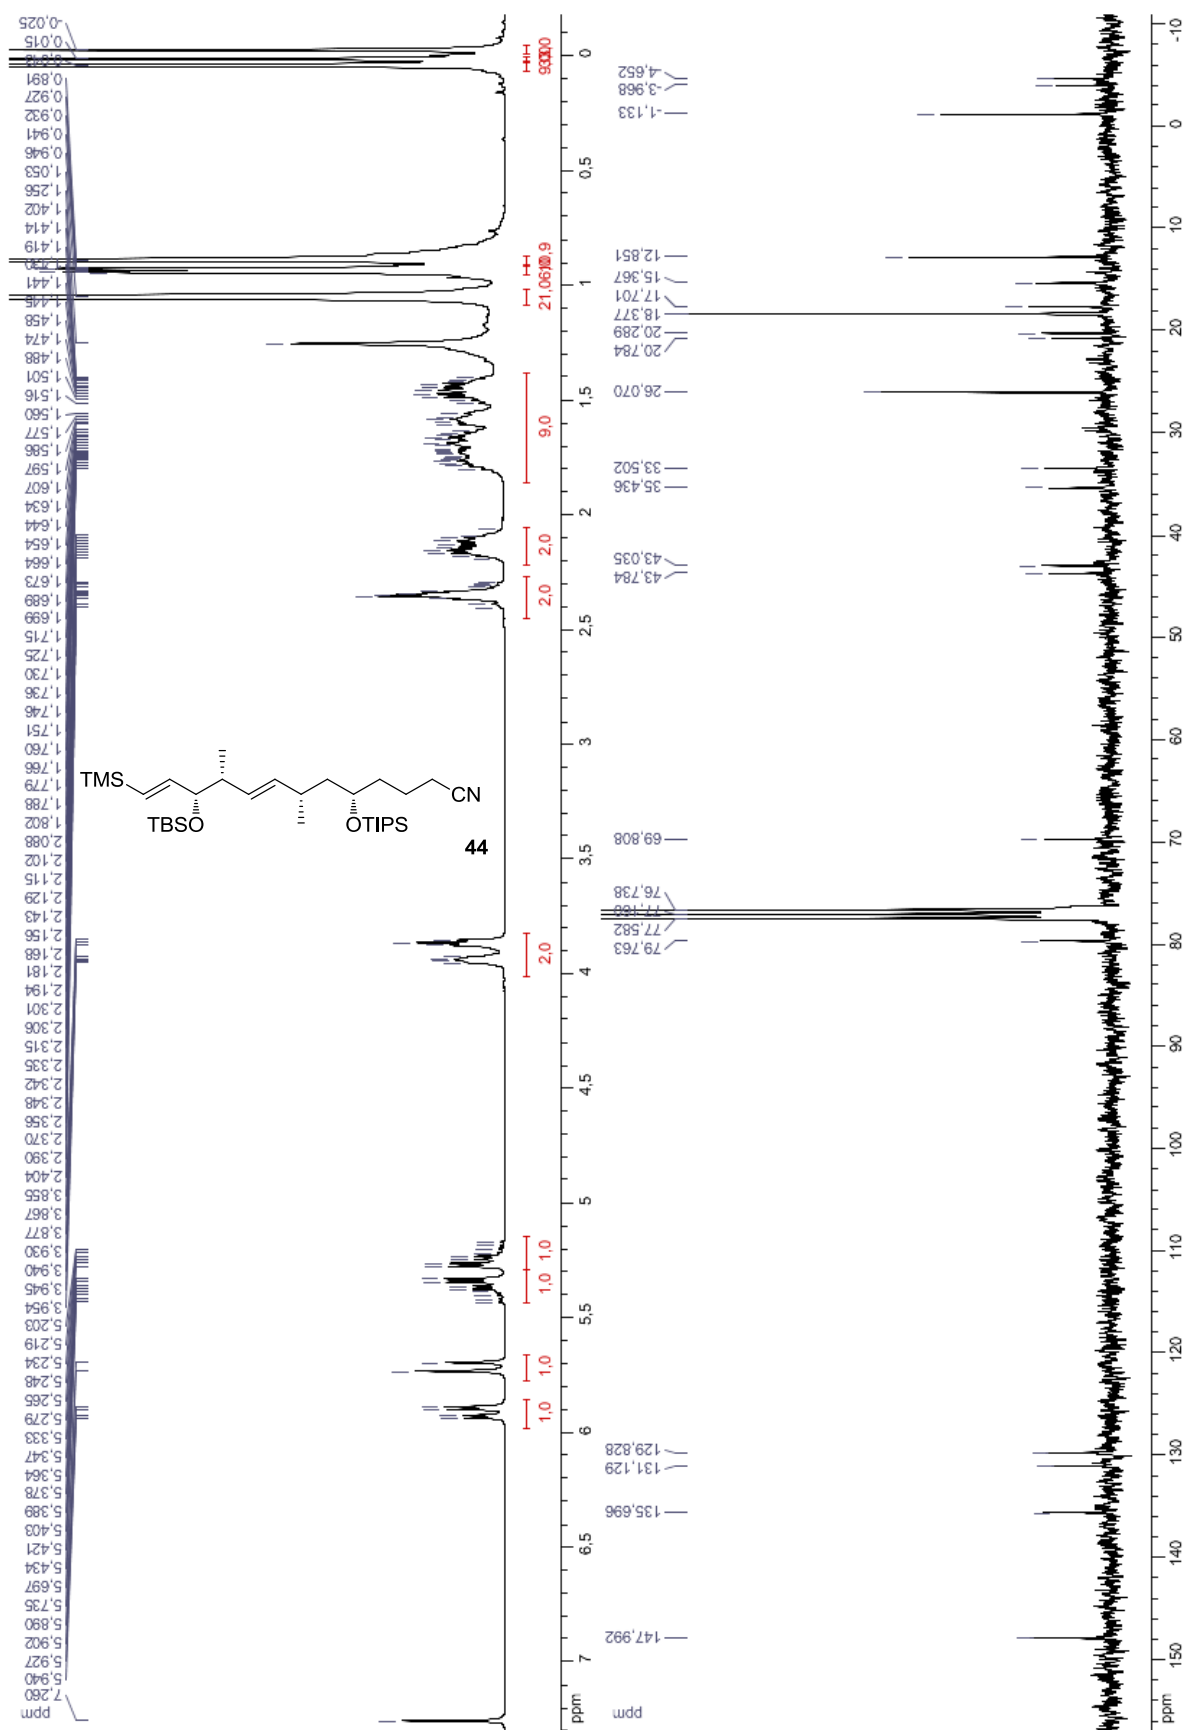

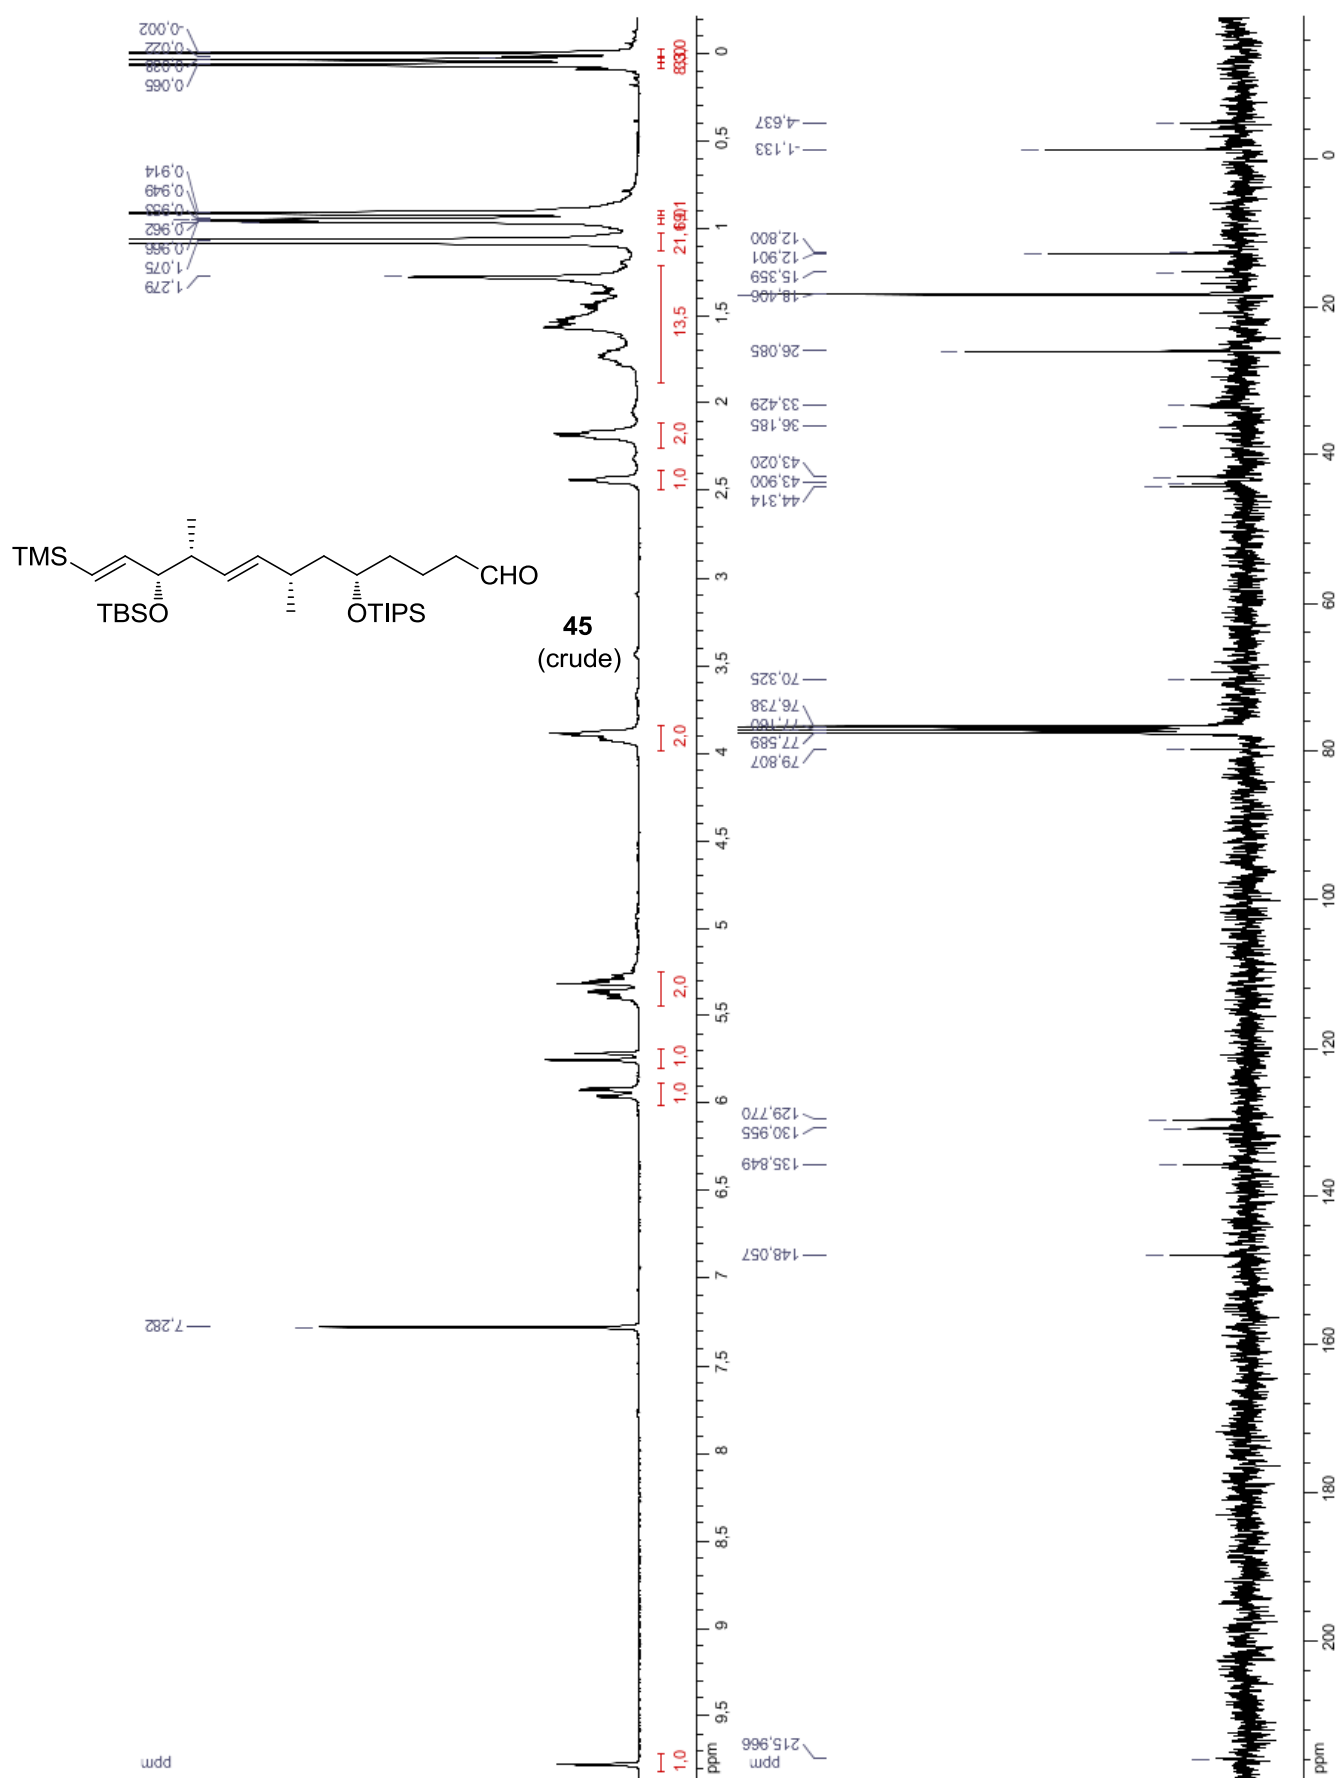

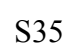

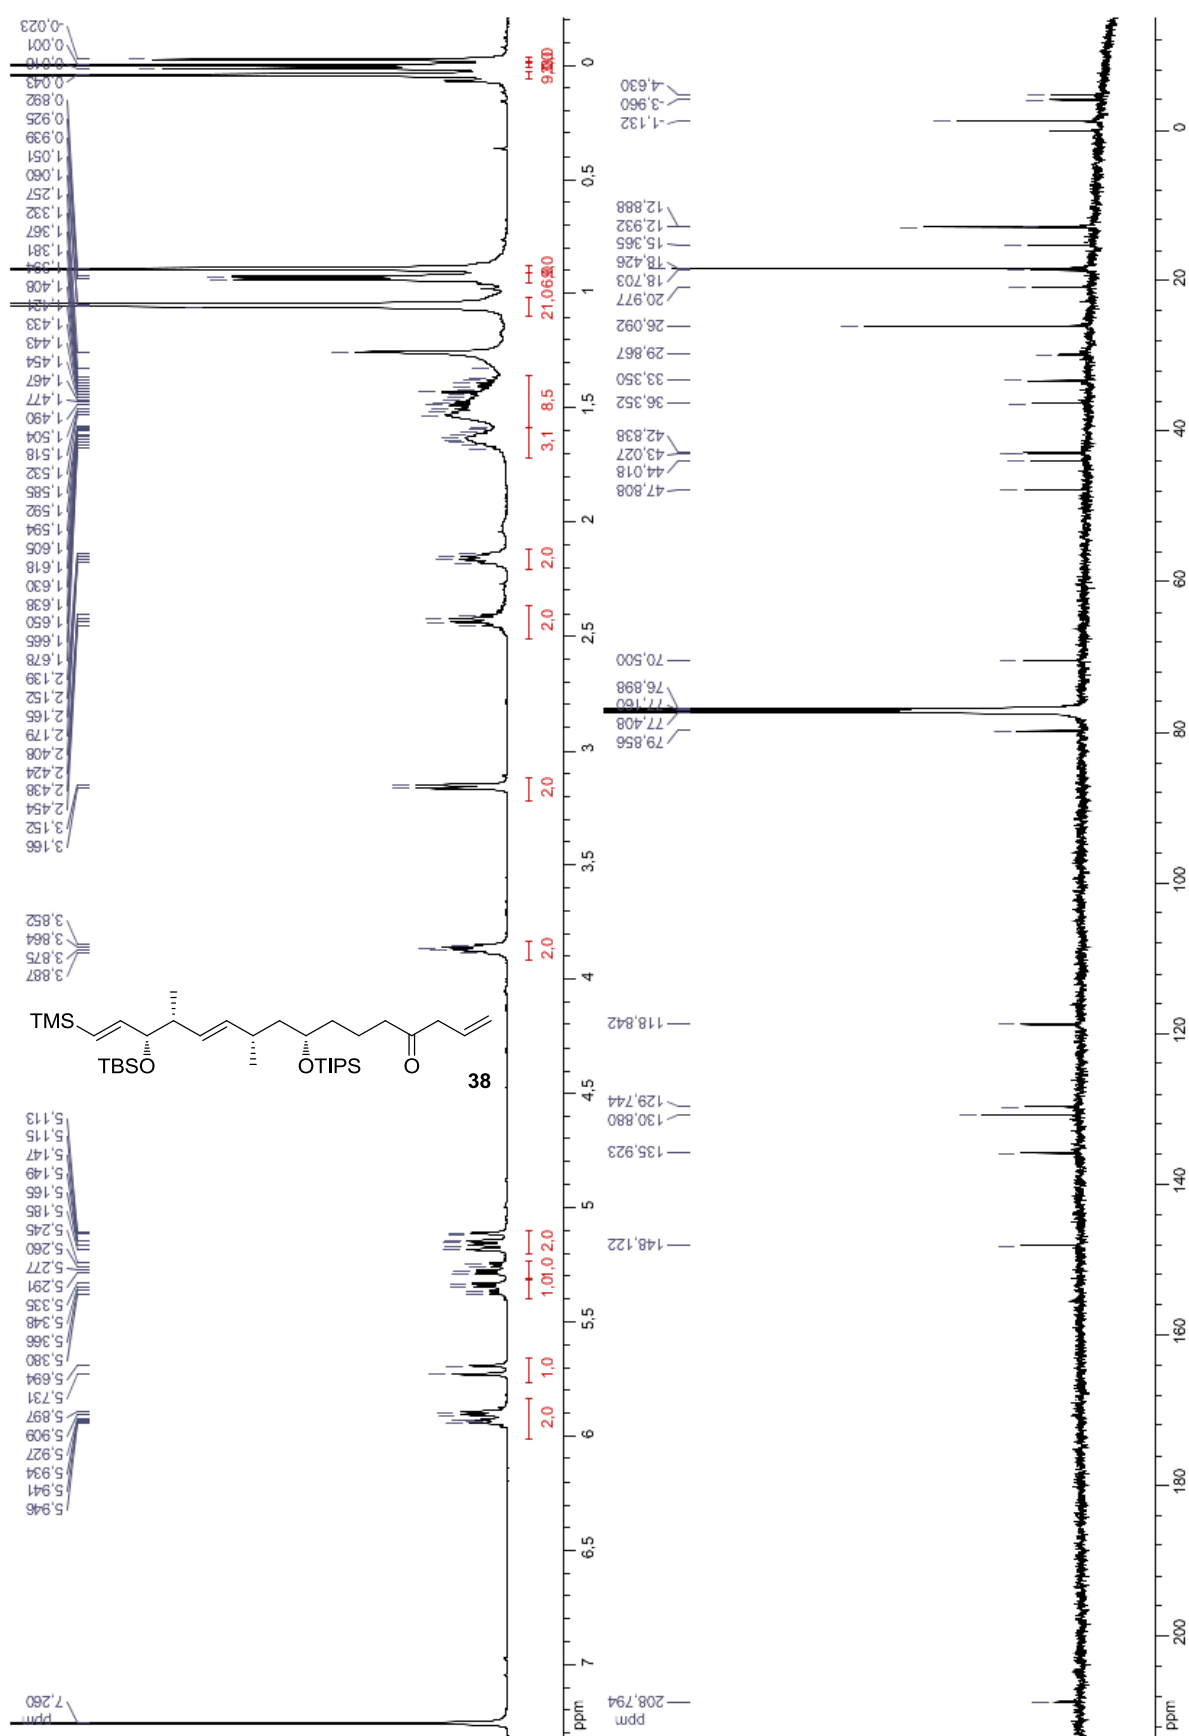

Supplement: Supplementary file 1 [file 4138210]
